# Supplementary material for: Selective recognition and enrichment of C70 over C60 using an anthracene-based nanotube
Source: Royal Society of Chemistry journal article supplement (doi:10.1039/d4sc02814g), 2024-01-01
Supplement: d4sc02814g1.pdf [file d4sc02814g1.pdf]

## Supporting Information

# Selective Recognition and Enrichment of C<sub>70</sub> over C<sub>60</sub> Using an Anthracene-Based Nanotube

Hao Nian,<sup>‡ab</sup> Song-Meng Wang,<sup>‡a</sup> Yan-Fang Wang,<sup>a</sup> Yu-Tao Zheng,<sup>a</sup> Li-Shuo Zheng,<sup>a</sup> Xiaoping Wang,<sup>a</sup> Liu-Pan Yang,<sup>\*c</sup> Wei Jiang,<sup>\*at</sup> and Liping Cao<sup>\*b</sup>

<sup>a</sup> Department of Chemistry, Southern University of Science and Technology, Shenzhen, 518055, China.

<sup>b</sup> College of Chemistry and Materials Science, Northwest University, Xi'an, 710069, P. R. China.

<sup>c</sup> School of Pharmaceutical Science, Hengyang Medical School, University of South China, Hengyang, Hunan, 421001, China.

\*Corresponding author E-mail: [chcaoliping@nwu.edu.cn](mailto:chcaoliping@nwu.edu.cn), [jiangw@sustech.edu.cn](mailto:jiangw@sustech.edu.cn), [yanglp@usc.edu.cn](mailto:yanglp@usc.edu.cn).

‡ Hao Nian, Song-Meng Wang contributed equally to this work.

† deceased (2022.12).

## Table of Contents

|          |                                                            |     |
|----------|------------------------------------------------------------|-----|
| <b>1</b> | Experimental Methods Section                               | S1  |
|          | <b>1.1</b> General Method                                  | S1  |
|          | <b>1.2</b> <sup>1</sup> H NMR Titration Experiments Method | S1  |
|          | <b>1.3</b> Fluorescent Titration Experiments Method        | S2  |
|          | <b>1.4</b> X-Ray Single Crystallography Method             | S2  |
|          | <b>1.5</b> Computational Method                            | S2  |
|          | <b>1.6</b> Synthetic Procedures                            | S2  |
| <b>2</b> | Optical Stimuli-Responsive Properties                      | S9  |
| <b>3</b> | X-Ray Single Crystallography                               | S10 |
| <b>4</b> | <sup>1</sup> H NMR Titration Experiments                   | S12 |
| <b>5</b> | Fluorescent Titration Experiments                          | S14 |
| <b>6</b> | Job Plots and High-Resolution Mass Spectra (HRMS)          | S15 |
| <b>7</b> | Computational Data                                         | S16 |
| <b>8</b> | Stimuli-Responsive Properties                              | S18 |
| <b>9</b> | Atomic Coordinates Information                             | S20 |



# 1. Experimental Section

## 1.1. General Method

All the reagents involved in this research were commercially available and used without further purification unless otherwise noted (Bis(pinacolato)diboron, Bidepharm, 98%; Potassium phosphate tribasic, Energy-chemical, 99%; PdCl<sub>2</sub>(dppf), Bidepharm, 98%; 2,6-Dibromo-4-methoxypyridine, Bidepharm, 96%; Pd(PPh<sub>3</sub>)<sub>4</sub>, Bidepharm, 98%; K<sub>2</sub>CO<sub>3</sub>, Energy-chemical, 99%; Extra dry N,N-Dimethylformamide (DMF) Energy-chemical, 99%; Toluene-d<sub>8</sub>, CIL, 99.6 atom % D; Chloroform-d<sub>1</sub>, CIL, 99.8 atom % D Dichloromethane-d<sub>2</sub>, CIL, 99.9 atom % D). Solvents for Column chromatography (Energy-chemical, 99%) were employed as purchased without further purification. Thin-layer chromatography (TLC) was carried out on 0.25 mm Leyan silica gel plates (60F-254). Column chromatography was performed on silica gel (200-300 mesh) as the stationary phase. <sup>1</sup>H, <sup>13</sup>C NMR, 2D NMR spectra were performed on Bruker AVANCE III 500M with Prodigy Platform. Chemical shifts are reported in ppm with residual solvents or TMS (tetramethylsilane) as the internal standards. The following abbreviations were used for signal multiplicities: s, singlet; d, doublet; dd, doublet of doublet; m, multiplet. Host-guest complexes were prepared by simply mixing the guests and hosts in 1: 1 stoichiometry in the corresponding solvent. Electrospray-ionization high-resolution mass spectrometry (ESI-HRMS) experiments were conducted on an applied Q-EXACTIVE mass spectrometry system. UV-Vis spectra were recorded on an SHIMADZU S-1700 UV-Vis spectrophotometers, using a 1 cm quartz cuvette. Fluorescent spectra were recorded on a Edinburgh FS5 spectrofluorometer, using a 1 cm quartz cuvette.

## 1.2. <sup>1</sup>H NMR Titration Experiments Method

The association constants for the complexes of **1** with C<sub>60</sub> are small (< 10<sup>5</sup> M<sup>-1</sup>) and the chemical exchange is fast at the NMR timescale. Thus, we used direct NMR titrations to determine their association constants in toluene.

For the complexes of **1** and C<sub>70</sub> with large association constants (> 10<sup>5</sup> M<sup>-1</sup>) and fast exchange kinetics, the association constants were determined by competitive NMR titrations and using guest C<sub>60</sub> (binding constant with **1** is 2.3 × 10<sup>4</sup> M<sup>-1</sup>) as the outgoing guest. The data from competitive titrations was nonlinearly fitted<sup>1</sup> according to the equations developed by Prof. Werner Nau (available from their website, <http://www.jacobs-university.de/ses/wnau>). All <sup>1</sup>H NMR titration experiments were repeated 3 times, and the averaged values and standard deviations are given.

## 1.3. Fluorescent Titration Experiments Method

The fluorescent titration experiments were conducted with excitation wavelength of 375 nm. The fluorescent intensity at 435 nm decreased with the addition of the guests, which were used for nonlinear

fitting. Nonlinear curve-fitting method was then used to obtain the association constant through the following equation:

$$I = I_0 + \left( (I_{GH} - I_0) / 2 / [H]_0 \right) \left( [H]_0 + [G]_0 + 1 / K_a - \sqrt{([H]_0 + [G]_0 + 1 / K_a)^2 - 4 [H]_0 [G]_0} \right)$$

#### 1.4. X-Ray Single Crystallography Method

Suitable single crystals of  $(1+3H)^{3+} \cdot (TFA^-)_3$  were successfully obtained by slow evaporation of their saturated solutions in toluene.

Single crystal X-ray data were collected on a Bruker D8 VENTURE with Ga K $\alpha$  radiation ( $\lambda = 1.34138$  Å) at 100 K. The structures were solved by intrinsic phasing methods (SHELXT) and refined by full-matrix least-squares F<sup>2</sup> using SHELXL<sup>2</sup> in the OLEX2 program package.<sup>3</sup> All non-hydrogen atoms were refined with anisotropic thermal parameters and the hydrogen atoms were fixed at calculated positions and refined by a riding mode.

#### 1.5. Computational Method

Geometry optimizations were performed with Gaussian 16 software package,<sup>4</sup> using the  $\omega$ B97XD/6-31G(d)<sup>5,6</sup> method in vacuum. Frequency calculations were then conducted at the same computational level to confirm the nature of all located stationary points and to obtain the thermal correction to Gibbs free energy and enthalpy. Single point energy was calculated with Gaussian 16 software package using the  $\omega$ B97XD/6-311++G(d,p). The total Gibbs free energy of the complex is the addition of single point energy and the thermal correction to Gibbs free energy (ZPE +  $\Delta G_{0 \rightarrow T}$ ). Non-covalent interaction (Independent gradient model based on Hirshfeld partition, IGMH) analysis<sup>7</sup> was carried out with Multiwfn 3.8 (dev) program<sup>8,9</sup> and visualized by the VMD 1.9.3 program.<sup>10</sup> (set isovalue = 0.008).

#### 1.6 Synthetic Procedures

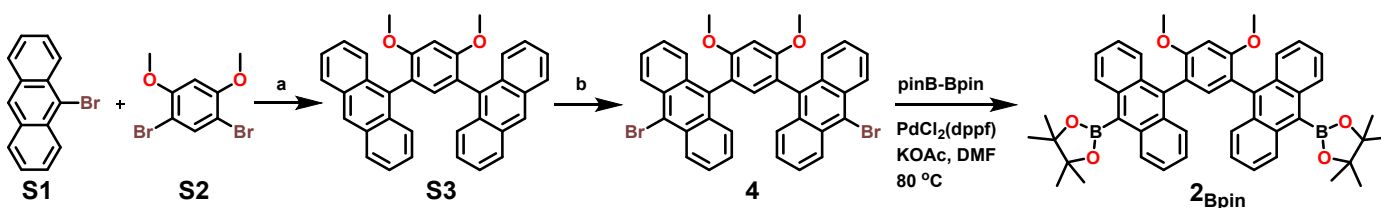

**Figure S1.** Synthetic procedures of **2<sub>Bpin</sub>**.

The synthesis of **4** has been reported previously.<sup>11</sup> Reagents and conditions from **S1** to **4**: a) i) Ar atmosphere, **S1**, n-BuLi, THF, -80 °C; ii) ZnCl<sub>2</sub>, THF; iii) **S2**, PdCl<sub>2</sub>(PhCN)<sub>2</sub> catalyst, THF, 80 °C; b) DBH, THF, 0 °C to room temperature. Reagents and conditions from **4** to **2<sub>Bpin</sub>**: **4** (1.2 g, 1.85 mmol, 1.0 equiv.), bis(pinacolato)diboron (2.8 g, 11.0 mmol, 6.0 equiv.), potassium acetate (2.4 g, 24.5 mmol, 13.0 equiv.) and PdCl<sub>2</sub>(dppf) (0.3 g, 0.37 mmol, 0.2 equiv.) were dissolved in the dry DMF (500 mL) in a two-neck flask under Ar atmosphere. The resulting mixture was stirred avoiding light at 80 °C for 12 h. After the reaction, the solvents were evaporated under reduced pressure, and the residue was

poured into water. The resulting suspension was extracted with ethyl acetate (200 mL × 3). The combined organic phases were washed consecutively with brine (200 mL × 3) and dried over anhydrous Na<sub>2</sub>SO<sub>4</sub>. After removing the ethyl acetate, the residue was purified by column chromatography (SiO<sub>2</sub>, Hexane / CH<sub>2</sub>Cl<sub>2</sub> = 1 / 2) to give the compound **2**<sub>Bpin</sub> as a light green solid (0.6 g, 43 %).

**2**<sub>Bpin</sub>: <sup>1</sup>H NMR (500 MHz, CDCl<sub>3</sub>, 298K) δ [ppm] = 8.45 (d, *J* = 8.6 Hz, 4H), 7.93 (d, *J* = 8.7 Hz, 4H), 7.48 (ddd, *J* = 8.4, 6.4, 1.4 Hz, 4H), 7.42 (ddd, *J* = 8.0, 6.6, 1.3 Hz, 4H), 7.16 (s, 1H), 6.95 (s, 1H), 3.73 (s, 6H), 1.60 (s, 24H).

**2**<sub>Bpin</sub>: <sup>13</sup>C NMR (126 MHz, CDCl<sub>3</sub>, 298K) δ [ppm] = 158.81, 136.20, 136.07, 135.58, 130.33, 128.53, 127.35, 125.29, 124.79, 119.64, 96.46, 84.37, 56.04, 25.23.

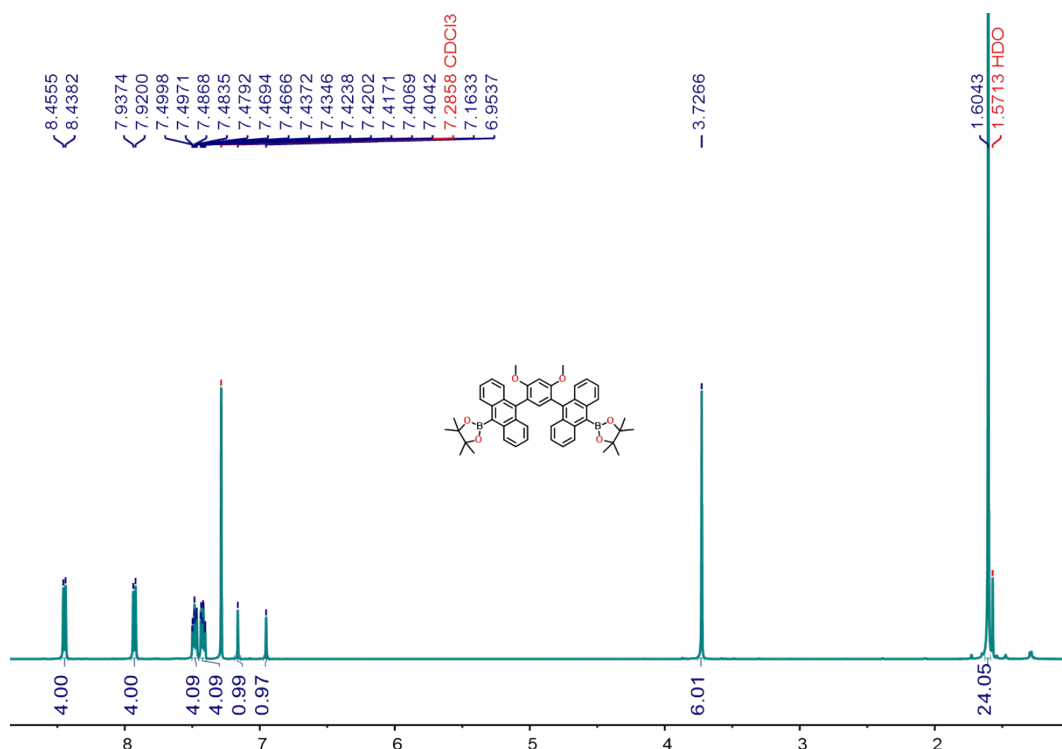

**Figure S2.** <sup>1</sup>H NMR spectrum (500 MHz, CDCl<sub>3</sub>, 298 K) of **2**<sub>Bpin</sub>.

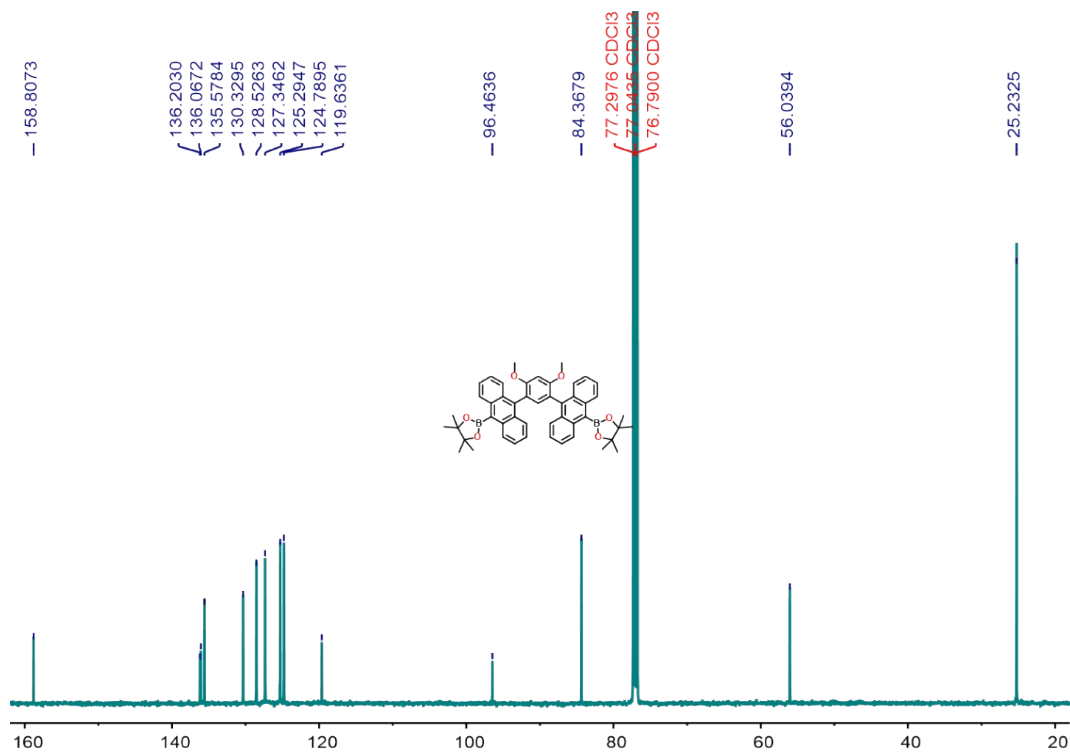

**Figure S3.** <sup>13</sup>C NMR spectrum (126 MHz, CDCl<sub>3</sub>, 298 K) of **2Bpin**.

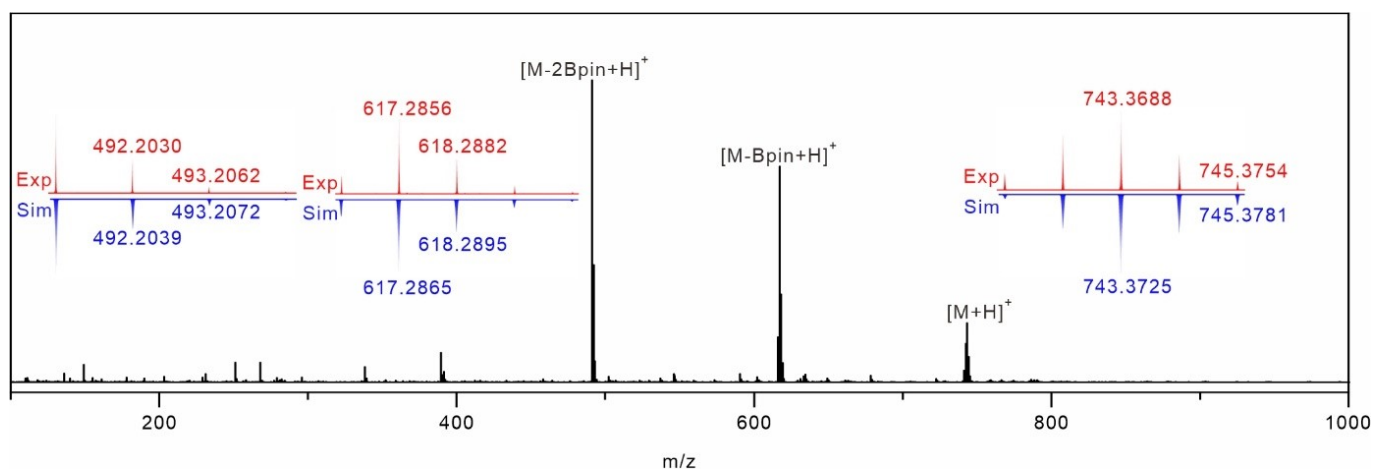

**Figure S4.** Experimental and simulated ESI mass spectra of **2Bpin**.

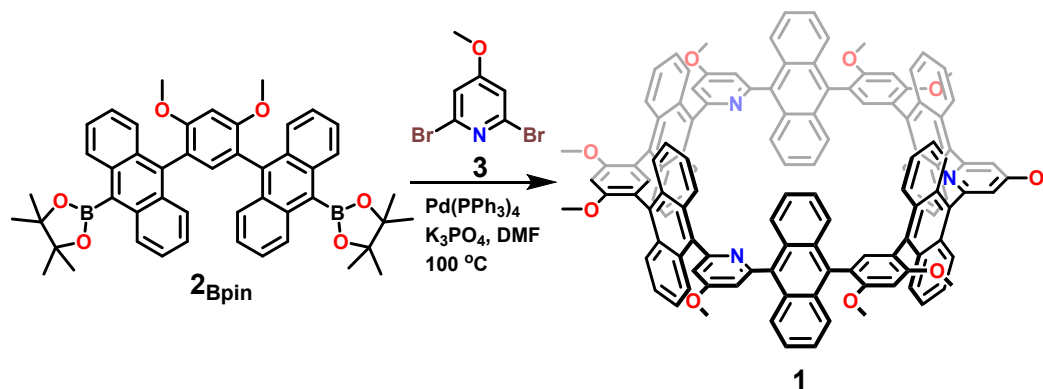

**Figure S5.** Synthetic procedures of nanotube **1**.

2,6-Dibromo-4-methoxypyridine **3** (0.16 g, 0.6 mmol, 1 equiv.), potassium phosphate tribasic (0.64 g, 3.0 mmol, 5 equiv.), Pd(PPh<sub>3</sub>)<sub>4</sub> (0.14 g, 0.12 mmol, 0.2 equiv.) and **2**<sub>Bpin</sub> (0.45 g, 0.6 mmol, 1 equiv.) were dissolved in the DMF (350 mL) in a two-neck flask under Ar atmosphere. The resulting mixture was stirred avoiding light at 100 °C for 24 h. After the reaction, the solvents were evaporated under reduced pressure, and the residue was poured into water. The resulting suspension was extracted with dichloromethane (100 mL × 3). The combined organic phases were washed consecutively with brine (100 mL × 3) and dried over anhydrous Na<sub>2</sub>SO<sub>4</sub>. After removing the dichloromethane, the residue was purified by column chromatography (SiO<sub>2</sub>, Hexane / CH<sub>2</sub>Cl<sub>2</sub> = 1 / 0 to 0 / 1) to give the compound **1** as a light yellow solid (18 mg, 5 %).

**1**: <sup>1</sup>H NMR (500 MHz, CD<sub>2</sub>Cl<sub>2</sub>, 298K) δ [ppm] = 7.93 – 7.85 (m, 24H), 7.41 (qd, *J* = 6.5, 3.2 Hz, 24H), 7.30 (s, 6H), 7.09 (s, 3H), 7.05 (s, 3H), 4.00 (s, 9H), 3.85 (s, 18H).

**1**: <sup>13</sup>C NMR (126 MHz, CD<sub>2</sub>Cl<sub>2</sub>, 298K) δ [ppm] = 166.28, 159.97, 158.80, 136.07, 135.34, 134.07, 130.37, 129.53, 126.82, 126.34, 125.31, 124.97, 119.12, 111.88, 95.86, 55.95, 55.57, 29.69.

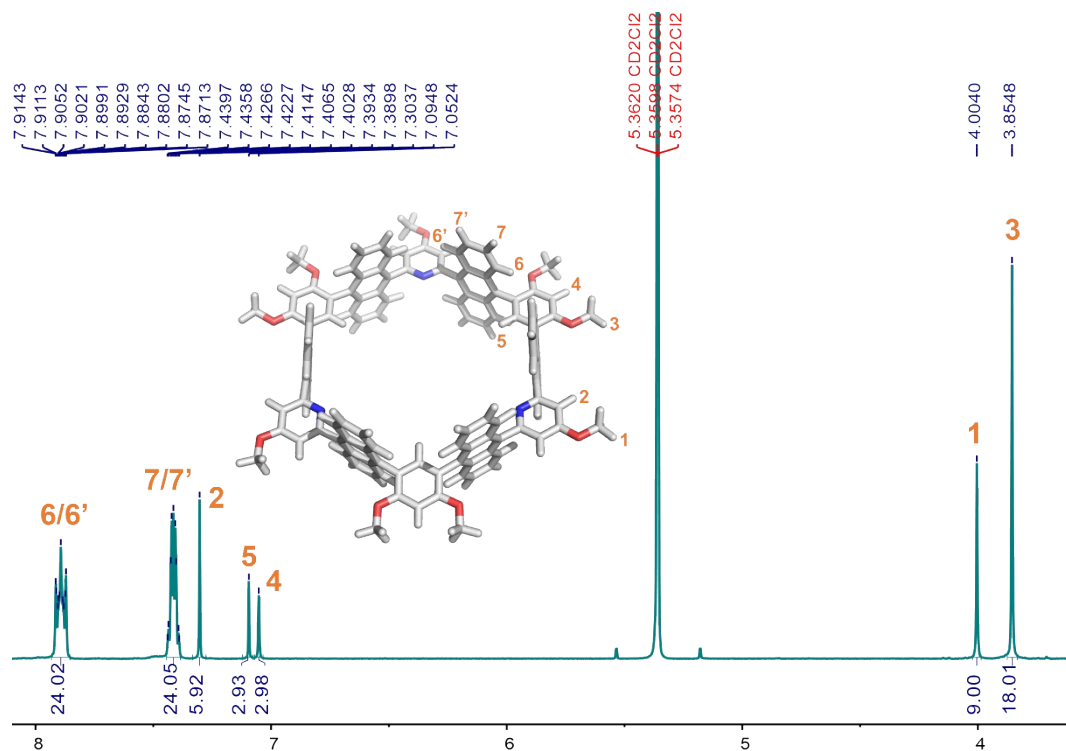

**Figure S6.**  $^1\text{H}$  NMR spectrum (500 MHz,  $\text{CD}_2\text{Cl}_2$ , 298 K) of **1**.

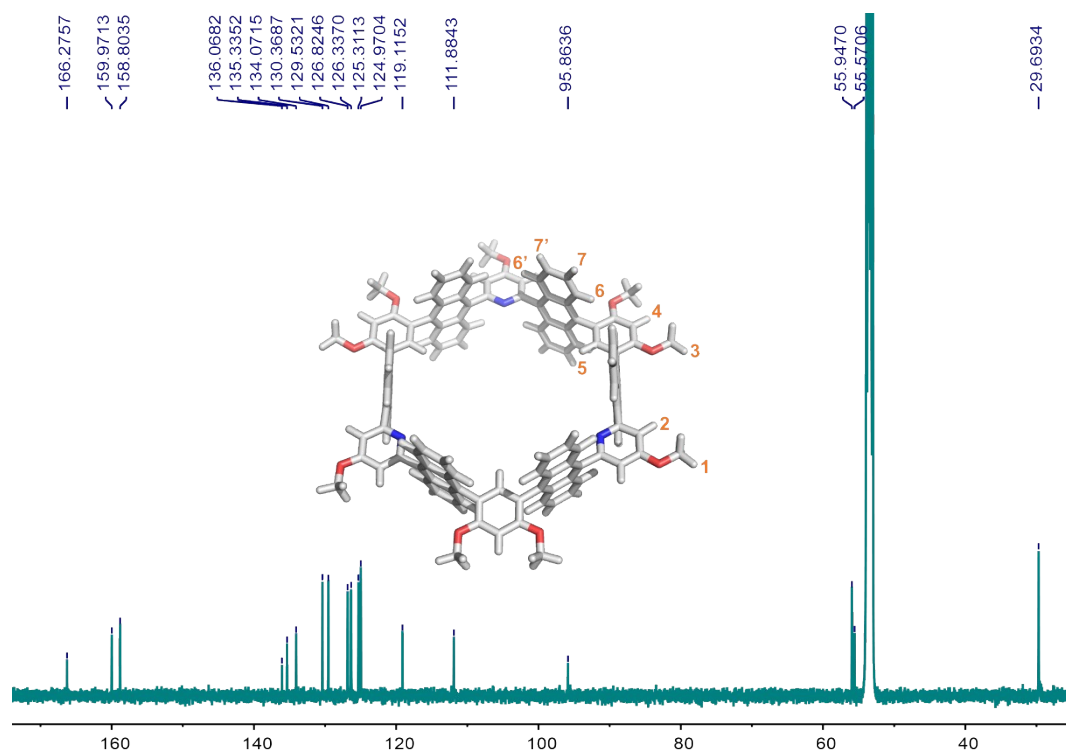

**Figure S7.**  $^{13}\text{C}$  NMR spectrum (126 MHz,  $\text{CD}_2\text{Cl}_2$ , 298 K) of **1**.



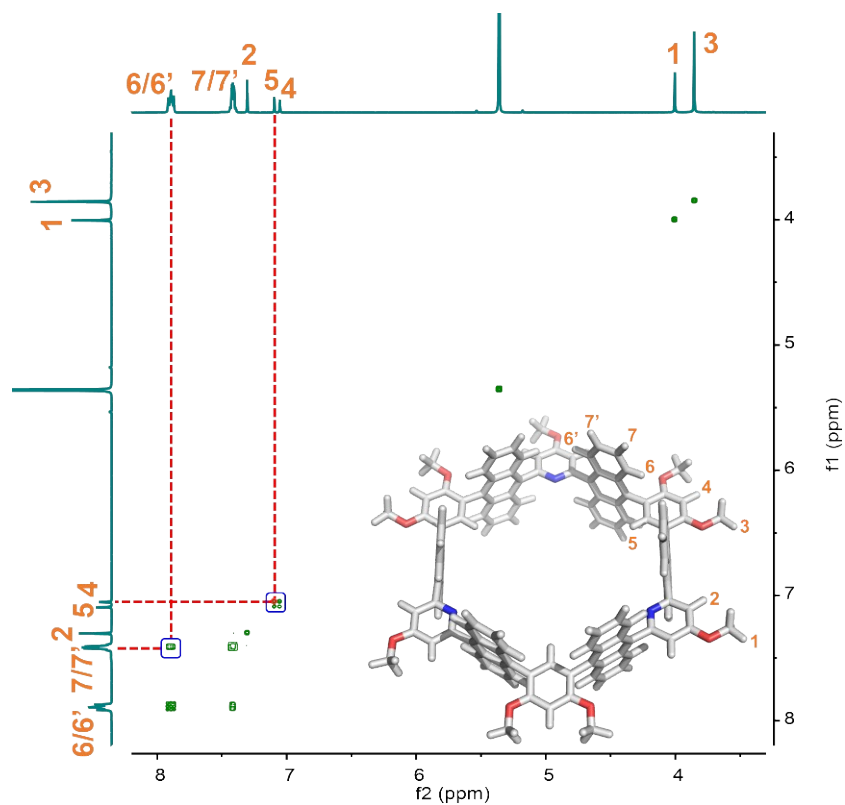

**Figure S8. 2D NMR spectra of nanotubes.**  $^1\text{H},^1\text{H}$ -COSY NMR spectrum of **1** (500 MHz,  $\text{CD}_2\text{Cl}_2$ , 298 K). The  $^1\text{H},^1\text{H}$ -COSY signals of protons are marked with blue boxes.

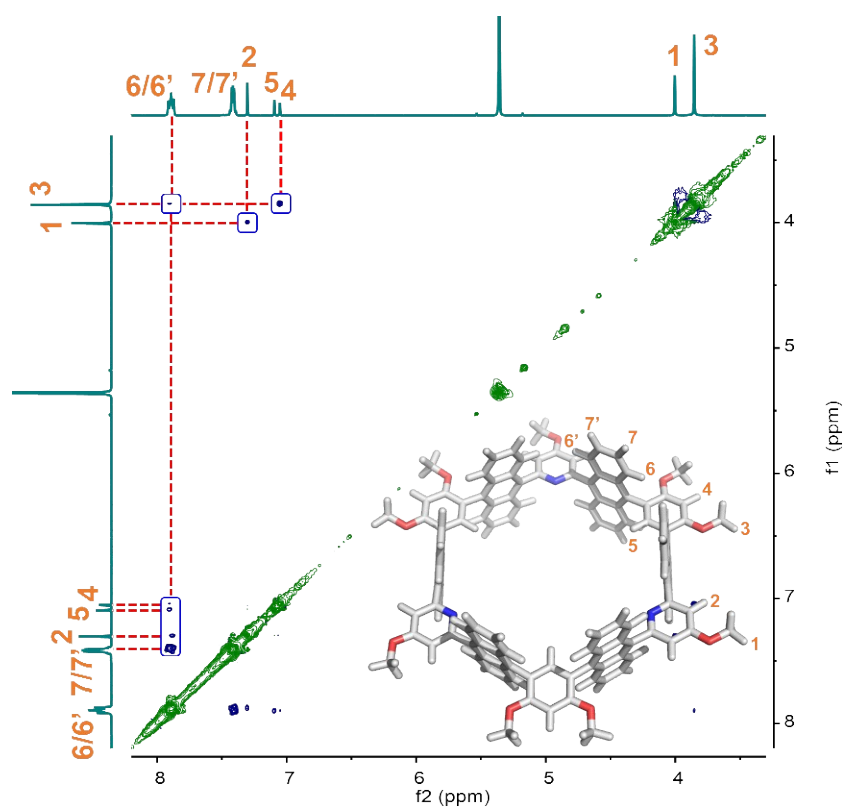

**Figure S9. 2D NMR spectra of nanotubes.**  $^1\text{H},^1\text{H}$ -ROESY NMR spectrum of **1** (500 MHz,  $\text{CD}_2\text{Cl}_2$ , 298 K). The NOE signals of protons are marked with blue boxes.

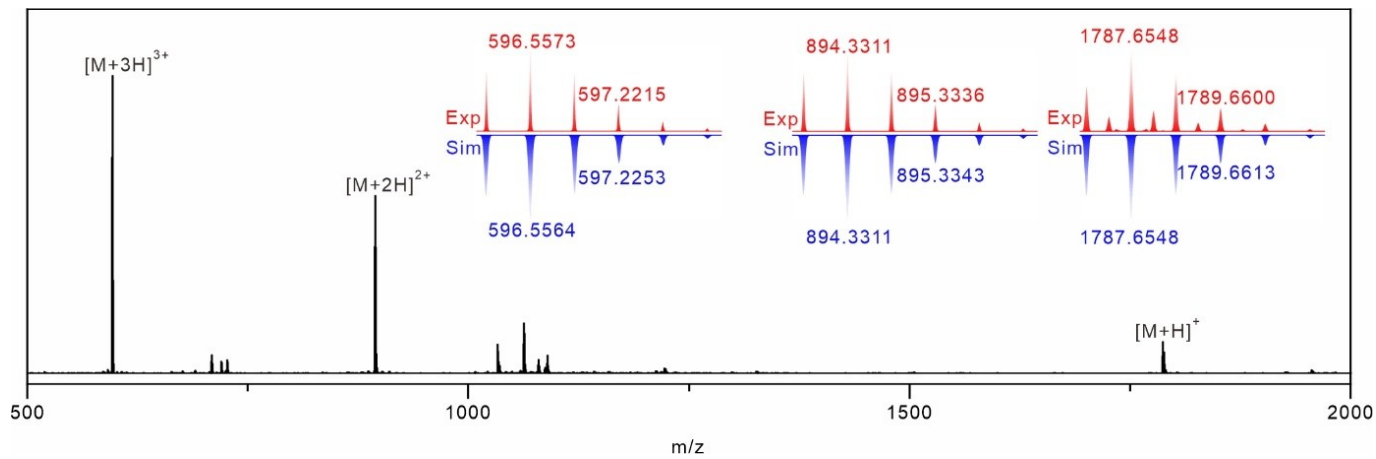

**Figure S10.** Experimental and simulated ESI mass spectra of **1**.

## 2. Optical Stimuli-Responsive Properties

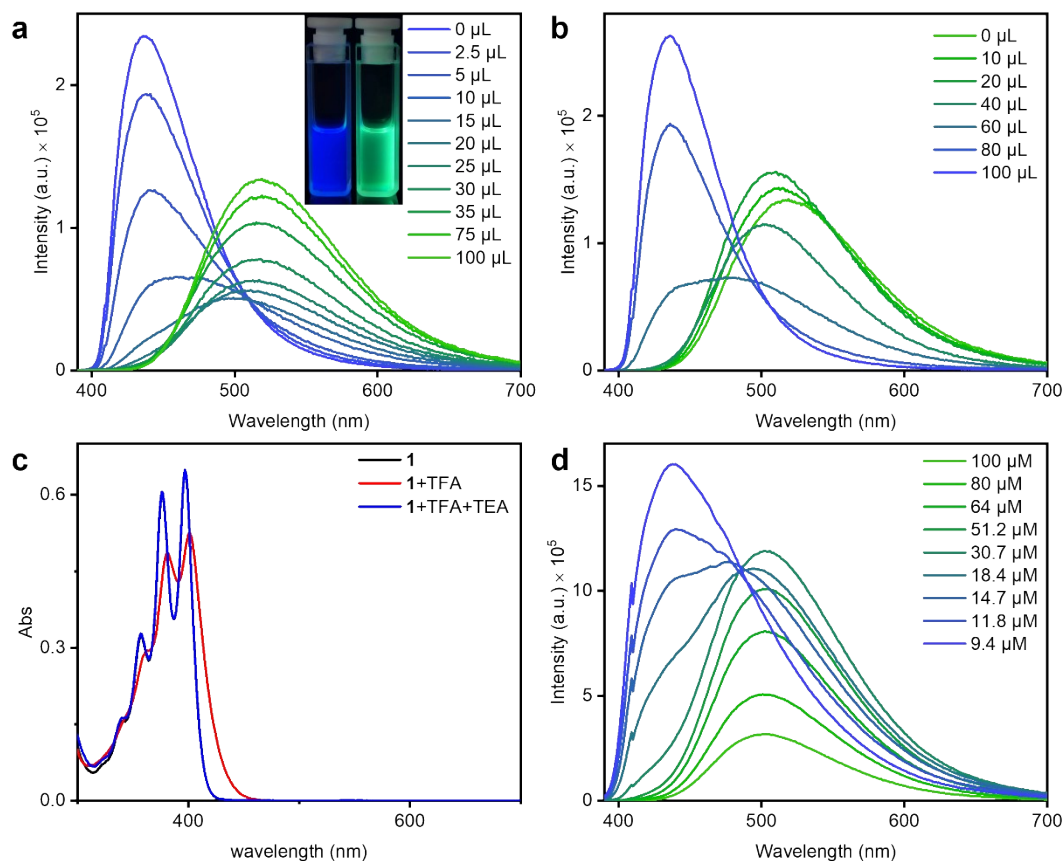

**Figure S11.** Fluorescence emission spectra of a) nanotube **1** (100  $\mu\text{M}$  in toluene, 2.5 mL in quartz cuvette) by adding different volume of trifluoroacetic acid (TFA, 250 mM in toluene); b) **1** with excess TFA (green line, 100  $\mu\text{M}$  in toluene), the spectrum shifts from 518 nm to 436 nm by adding different volume of triethylamine (TEA, 125 mM in toluene); c) UV-Vis spectra of **1** with pH-driven reversibility (5  $\mu\text{M}$  in toluene, then added 100 equiv TFA, subsequently added 100 equiv TEA) and d) different concentrations of protonated nanotube **1** after adding excess TFA (100 equiv).

### 3. X-Ray Single Crystallography

**Table S1:** Crystal data and structure refinement for  $(\mathbf{1}+3\mathbf{H})^{3+}\cdot(\mathbf{TFA}^-)_3$

| entry                                     | $(\mathbf{1}+3\mathbf{H})^{3+}\cdot(\mathbf{TFA}^-)_3$                                                         |
|-------------------------------------------|----------------------------------------------------------------------------------------------------------------|
| Moiety formula                            | $\text{C}_{126}\text{H}_{87}\text{N}_3\text{O}_9, 5(\text{C}_2\text{HF}_3\text{O}_2), 4(\text{C}_7\text{H}_8)$ |
| Empirical formula                         | $\text{C}_{164}\text{H}_{124}\text{F}_{15}\text{N}_3\text{O}_{19}$                                             |
| Formula weight                            | 2725.65                                                                                                        |
| Temperature/K                             | 100.00                                                                                                         |
| Crystal system                            | triclinic                                                                                                      |
| Space group                               | <i>P</i> -1                                                                                                    |
| a/Å                                       | 11.7820(6)                                                                                                     |
| b/Å                                       | 18.0992(10)                                                                                                    |
| c/Å                                       | 38.789(2)                                                                                                      |
| $\alpha/^\circ$                           | 87.108(3)                                                                                                      |
| $\beta/^\circ$                            | 89.657(2)                                                                                                      |
| $\gamma/^\circ$                           | 86.001(3)                                                                                                      |
| Volume/Å <sup>3</sup>                     | 8240.8(8)                                                                                                      |
| Z                                         | 2                                                                                                              |
| $\rho_{\text{calc}}/\text{cm}^3$          | 1.098                                                                                                          |
| $\mu/\text{mm}^{-1}$                      | 0.445                                                                                                          |
| F(000)                                    | 2832.0                                                                                                         |
| Reflections collected                     | 178709                                                                                                         |
| Independent reflections                   | 33623 [ $R_{\text{int}} = 0.0827$ , $R_{\text{sigma}} = 0.0700$ ]                                              |
| Data/restraints/parameters                | 33623/477/1896                                                                                                 |
| Goodness-of-fit on $F^2$                  | 1.071                                                                                                          |
| Final R indexes [ $ I  \geq 2\sigma(I)$ ] | $R_1 = 0.0904$ , $wR_2 = 0.2784$                                                                               |
| Final R indexes [all data]                | $R_1 = 0.1448$ , $wR_2 = 0.3228$                                                                               |
| CCDC number                               |                                                                                                                |

**Alert level B:**

PLAT097\_ALERT\_2\_B Large Reported Max. (Positive) Residual Density 0.95 eA-3

PLAT230\_ALERT\_2\_B Hirshfeld Test Diff for C04B --C04U . 7.2 s.u.

**Response:** The crystal has too weak diffraction to obtain high resolution data.

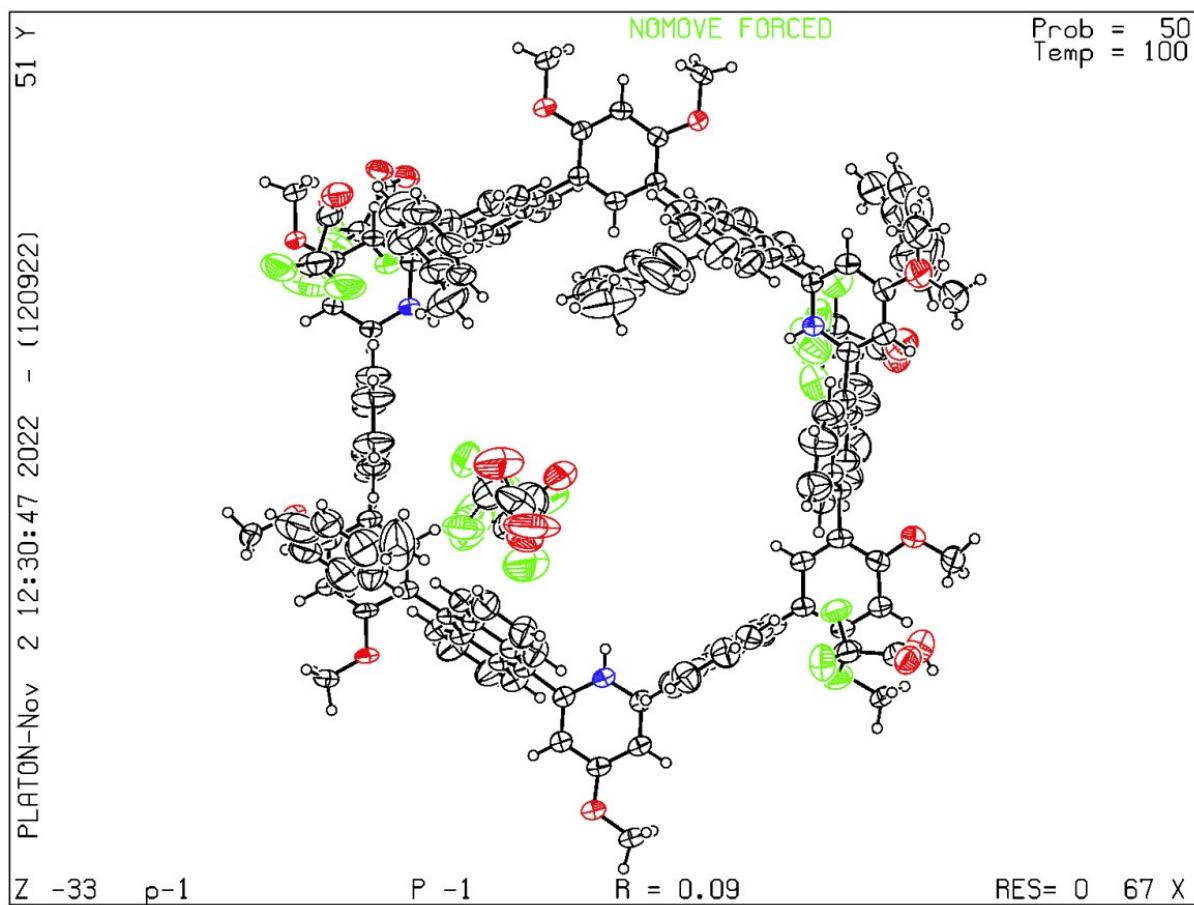

**Figure S12.** Crystal structure of  $(1+3H)^{3+} \cdot (TFA^-)_3$ .

## 4. $^1\text{H}$ NMR Titration Experiments

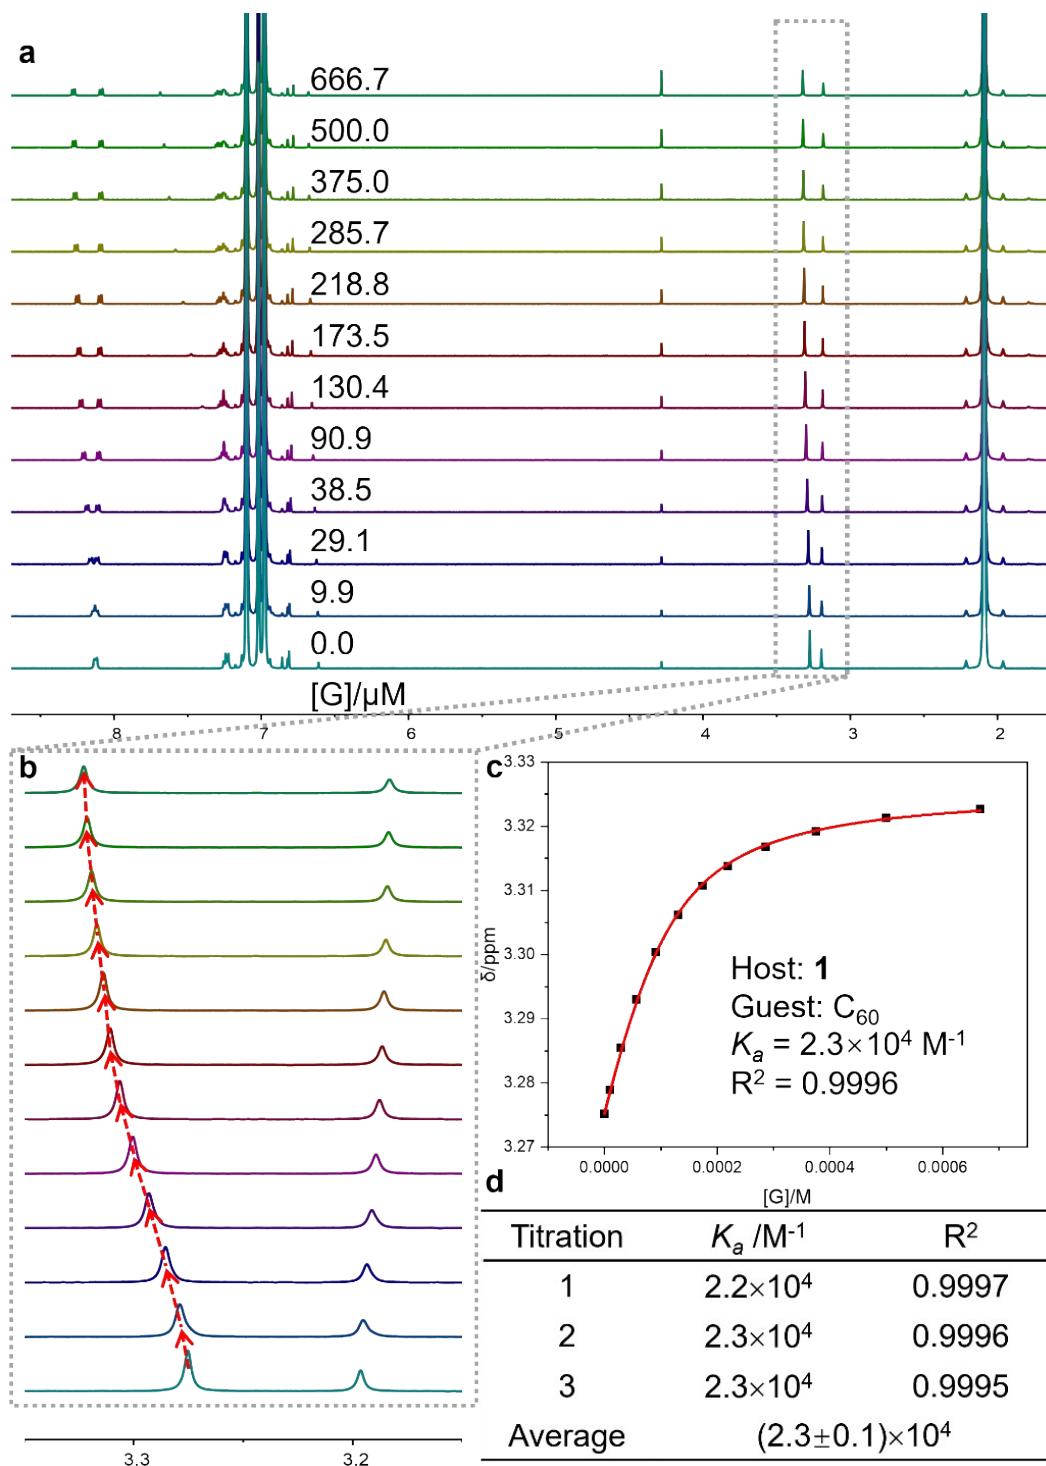

**Figure S13.  $^1\text{H}$  NMR titration experiments.** a)  $^1\text{H}$  NMR spectra (500 MHz, Toluene- $d_8$ , 298 K) of **1** (0.1 mM) titrated by  $\text{C}_{60}$ , the concentration range of  $\text{C}_{60}$  is 0 ~ 666.7  $\mu\text{M}$ ; b) Enlarged region at signals of proton b and c, the changes of signals of proton c with the addition of  $\text{C}_{60}$  are marked with red arrow and used for nonlinear fitting; c) Nonlinear fitting for the complexation between **1** and  $\text{C}_{60}$  based on the NMR data. The titration experiments were repeated 3 times; d) averaged values and standard deviations are given.

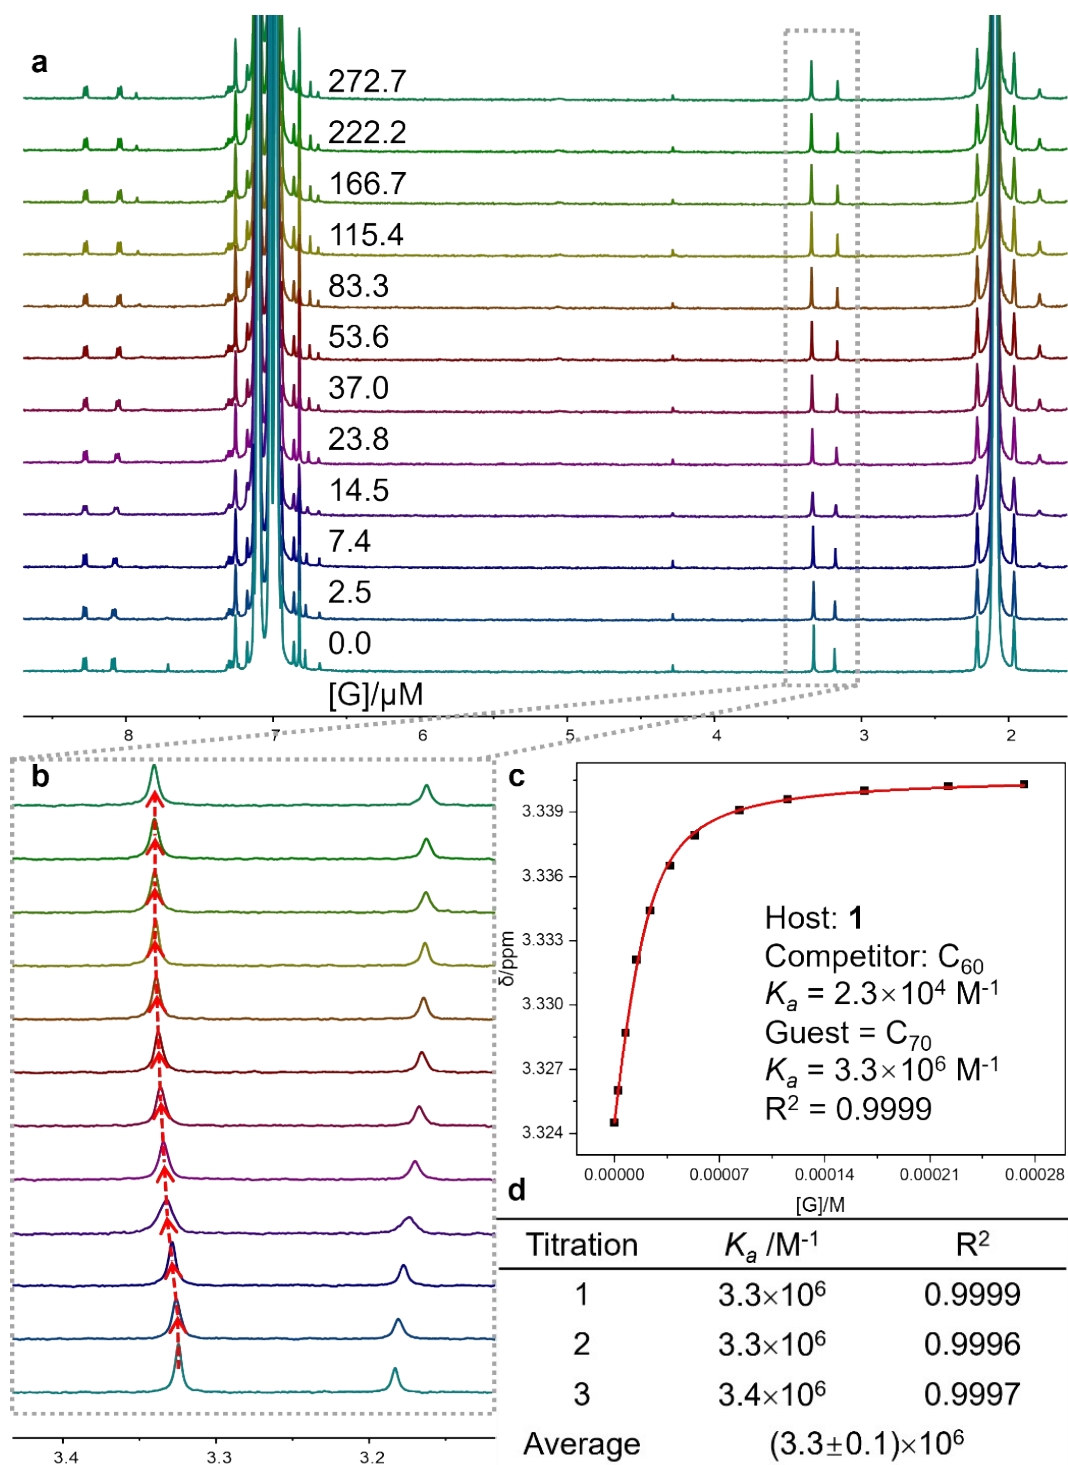

**Figure S14.  $^1\text{H}$  NMR titration experiments.** a)  $^1\text{H}$  NMR spectra (500 MHz, Toluene- $d_8$ , 298 K) of the mixture of **1** (0.01 mM) and  $\text{C}_{60}$  (1 mM, as a competitor) titrated by  $\text{C}_{70}$ , the concentration range of  $\text{C}_{70}$  is 0 ~ 272.7  $\mu\text{M}$ ; b) Enlarged region at signals of proton b and c, the changes of signals of proton c with the addition of  $\text{C}_{70}$  are marked with red arrow and used for nonlinear fitting; c) Nonlinear fitting for the complexation between **1** and  $\text{C}_{70}$  based on the NMR data. The titration experiments were repeated 3 times; d) averaged values and standard deviations are given.

## 5. Fluorescent Titration Experiments

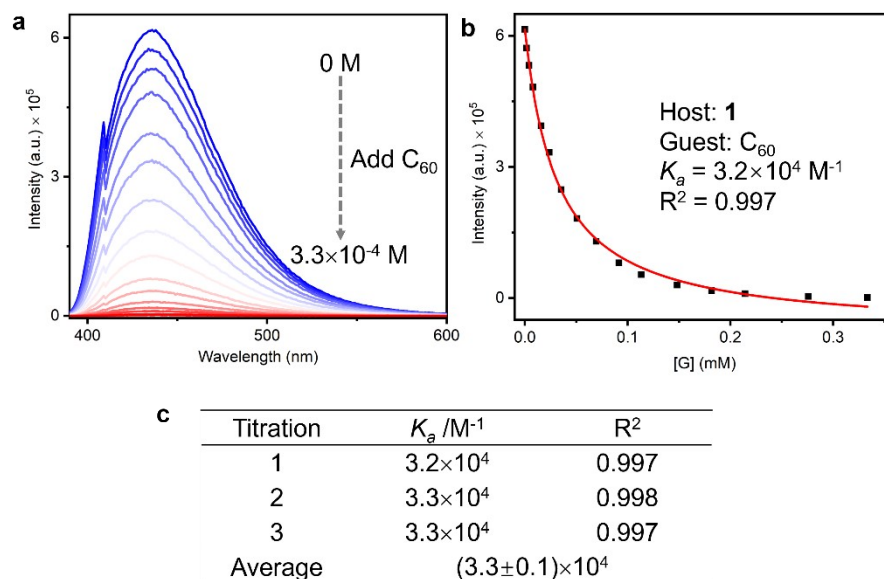

**Figure S15. Fluorescent titration experiments.** a) Fluorescent spectra ( $Slit_{ex} = 1.0$ ,  $Slit_{em} = 1.0$ ,  $Ex = 375$  nm) of **1** ( $2 \times 10^{-6}$  M) titrated by **C<sub>60</sub>**, the concentration range of **C<sub>60</sub>** is  $0 \sim 3.3 \times 10^{-4}$  M; b) The changes of fluorescent intensity at 435nm were used for nonlinear fitting; c) The titration experiments were repeated 3 times, and averaged values and standard deviations are given.

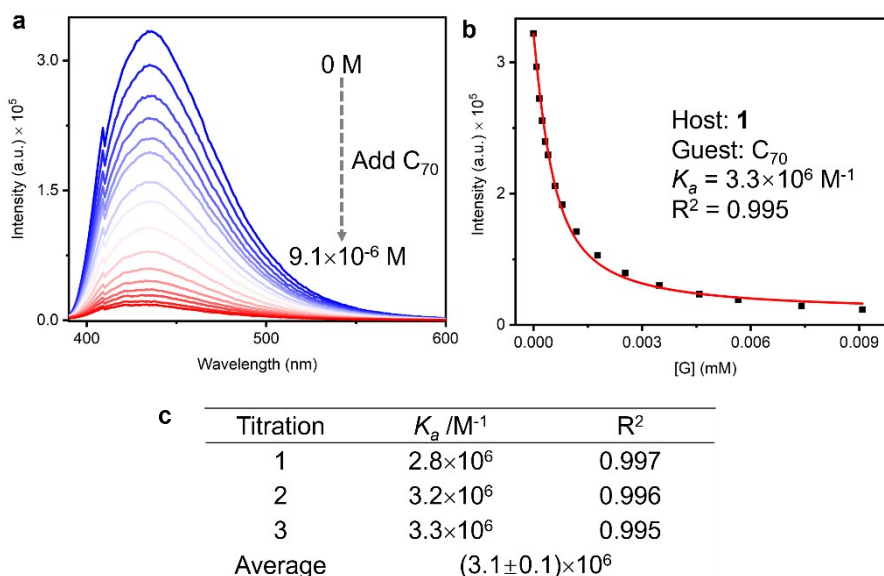

**Figure S16. Fluorescent titration experiments.** a) Fluorescent spectra ( $Slit_{ex} = 1.5$ ,  $Slit_{em} = 1.5$ ,  $Ex = 375$  nm) of **1** ( $4 \times 10^{-7}$  M) titrated by **C<sub>70</sub>**, the concentration range of **C<sub>60</sub>** is  $0 \sim 9.1 \times 10^{-6}$  M; b) The changes of fluorescent intensity at 435nm were used for nonlinear fitting; c) The titration experiments were repeated 3 times, and averaged values and standard deviations are given.



## 6. Job Plots and High-Resolution Mass Spectra (HRMS)

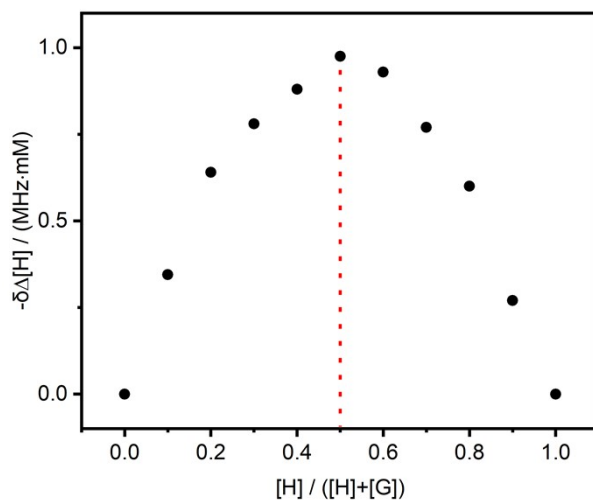

Figure S17. Job plots of 1-D60.

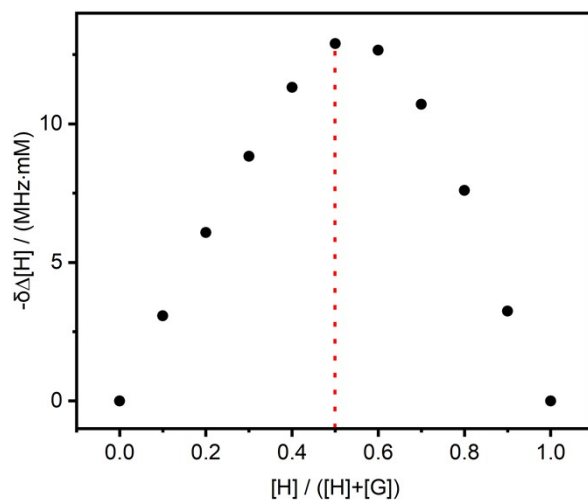

Figure S18. Job plots of 1-D60.

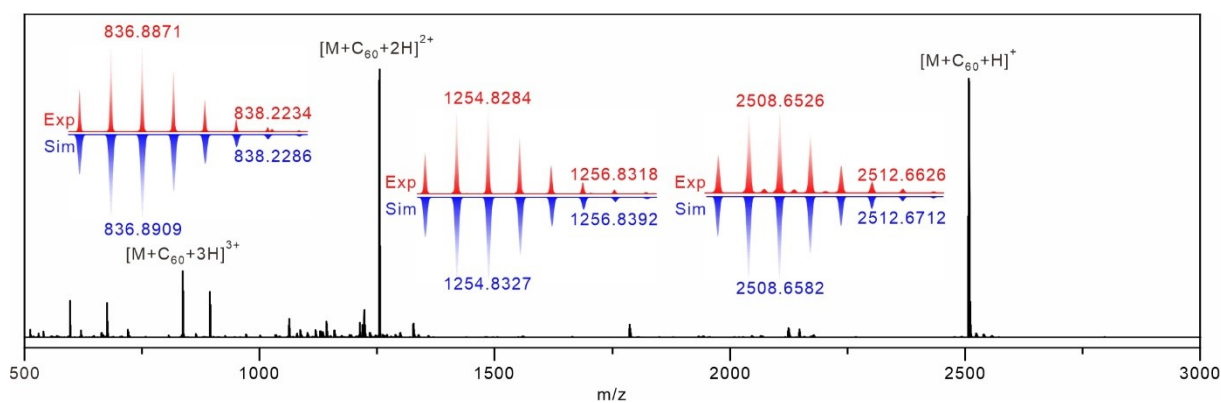

Figure S19. Experimental and simulated ESI mass spectra of 1-D60.

## 7. Computational Data

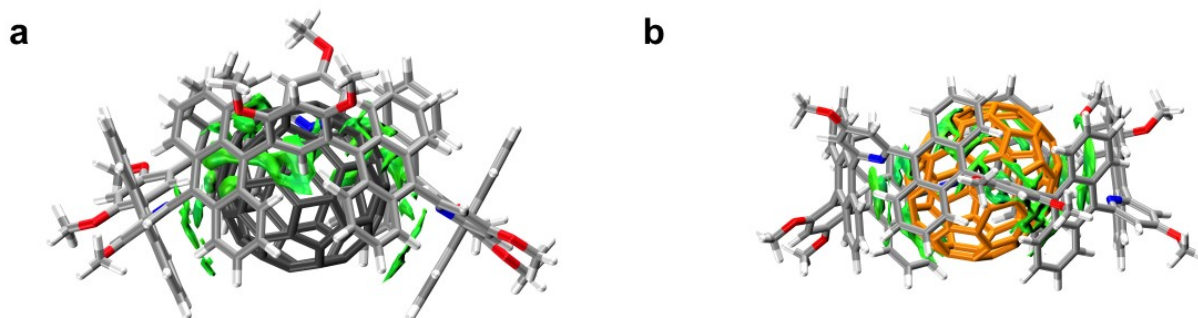

**Figure S20.** Side view of energy minimized structures with noncovalent interaction analysis of a)  $1>C_{60}$  and b)  $1>C_{70}$ .

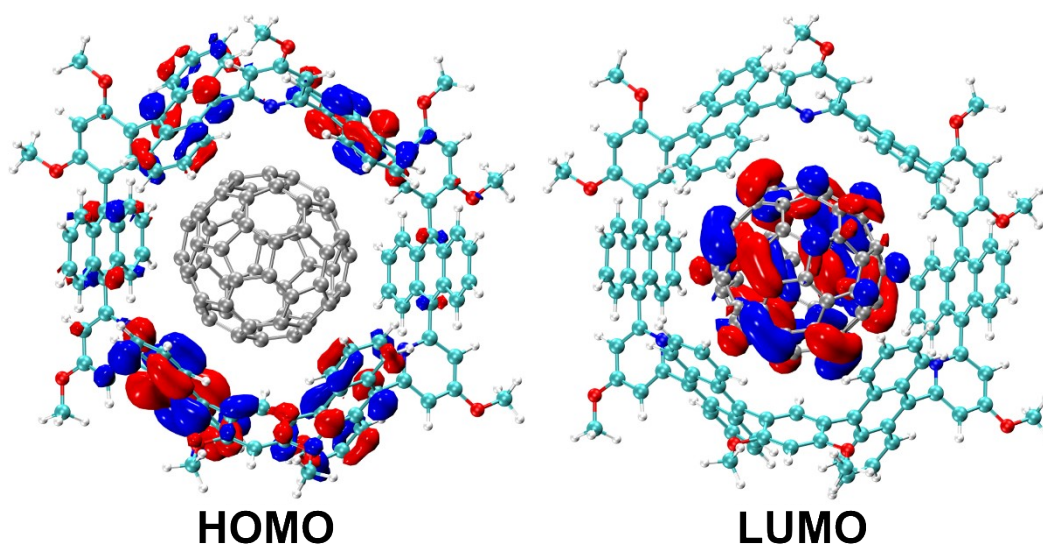

**Figure S21.** Analysis of frontier orbitals. Energy minimized structures and zero point energy obtained of  $1>C_{60}$  by DFT ( $\omega$ B97XD/6-31G(d) and  $\omega$ B97XD/6-311++G(d,p)) calculations in vacuum at 298 K. The HOMO-LUMO orbitals were calculated by Multiwfn 3.8 (dev) program and visualized by the VMD 1.9.3 program.

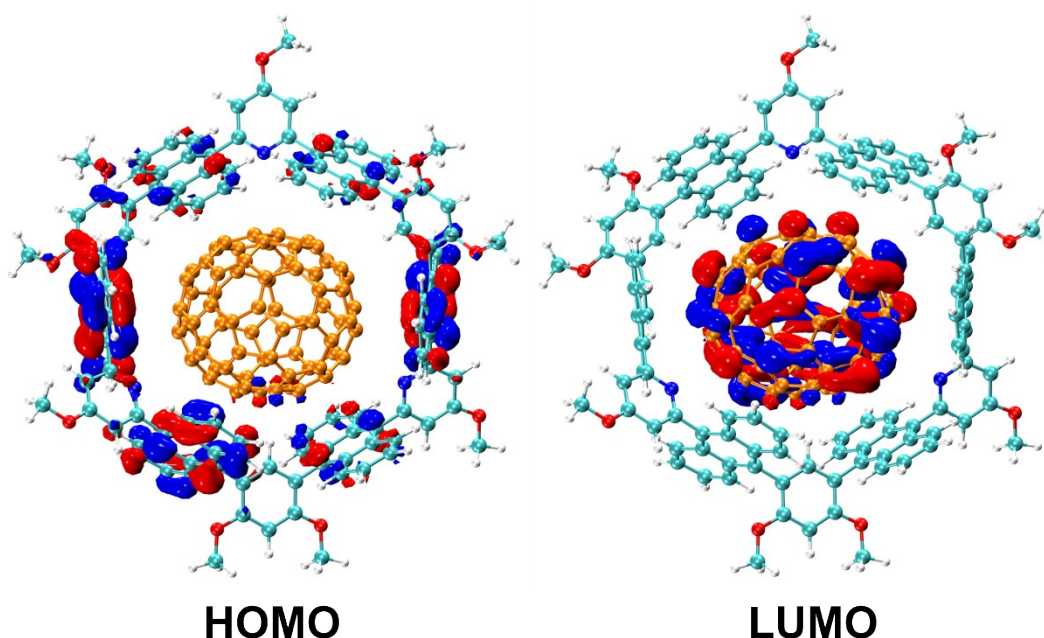

**Figure S22.** Analysis of frontier orbitals. Energy minimized structures and zero point energy obtained of  $1\supset C_{70}$  by DFT ( $\omega B97XD/6-31G(d)$  and  $\omega B97XD/6-311++G(d,p)$ ) calculations in vacuum at 298 K. The HOMO-LUMO orbitals were calculated by Multiwfn 3.8 (dev) program and visualized by the VMD 1.9.3 program.

**Table S2:** Thermodynamic parameters of all calculated structures (298 K) Gibbs free energy (ZPE +  $G_{0\rightarrow T}$ ) and enthalpy (ZPE +  $H_{0\rightarrow T}$ ) are obtained after thermal correction (kJ/mol). The binding energy is defined as:

$$E_{\text{binding}} = E_{\text{host-guest}} - E_{\text{host}} - E_{\text{guest}}$$

|                   | $\Delta G$  | $\Delta H$  | $-T\Delta S$ | $\Delta E_{\text{binding}}$ |
|-------------------|-------------|-------------|--------------|-----------------------------|
| $C_{60}$          | -6000657.0  | -6000489.0  | -168.0       | -                           |
| $C_{70}$          | -7000987.9  | -7000803.4  | -184.5       | -                           |
| <b>1</b>          | -14946932.6 | -14946222.3 | -710.3       | -                           |
| $1\supset C_{60}$ | -20947788.2 | -20946987.1 | -801.2       | -198.7                      |
| $1\supset C_{70}$ | -21948156.0 | -21947336.7 | -819.4       | -235.5                      |

Initial molecular coordinates of **1**,  $C_{60}$ ,  $C_{70}$ ,  $1\supset C_{60}$ , and  $1\supset C_{70}$  were obtained after optimization with PM6

## 8. Stimuli-Responsive Properties

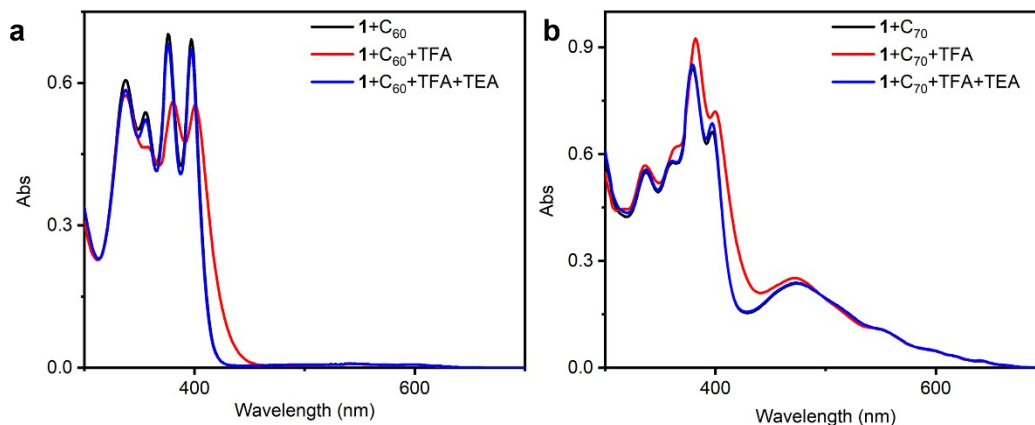

**Figure S23.** UV-Vis spectra of a)  $1+C_{60}$ , and b)  $1+C_{70}$  with pH-driven reversibility. The spectra were recorded with 5  $\mu$ M host and/or host-guest complexes, then added 100 equiv TFA, subsequently added 100 equiv TEA.

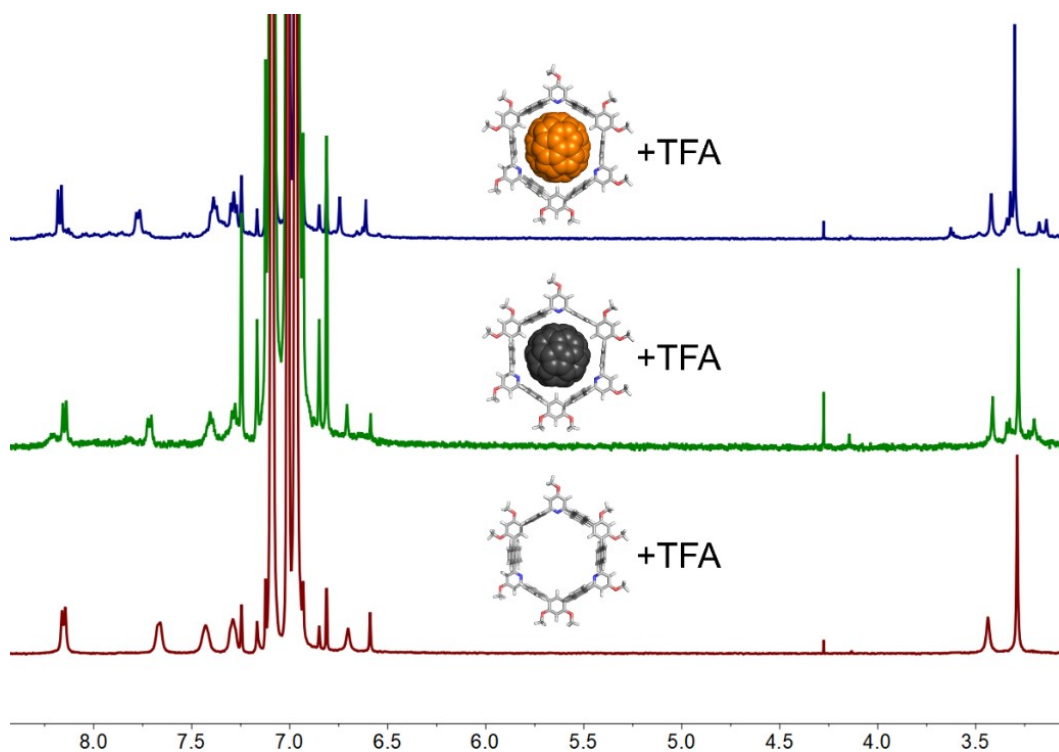

**Figure S24.**  $^1H$  NMR spectra of nanotube **1** and host-guest complexes with excess TFA ( $\sim$ 100 equiv).

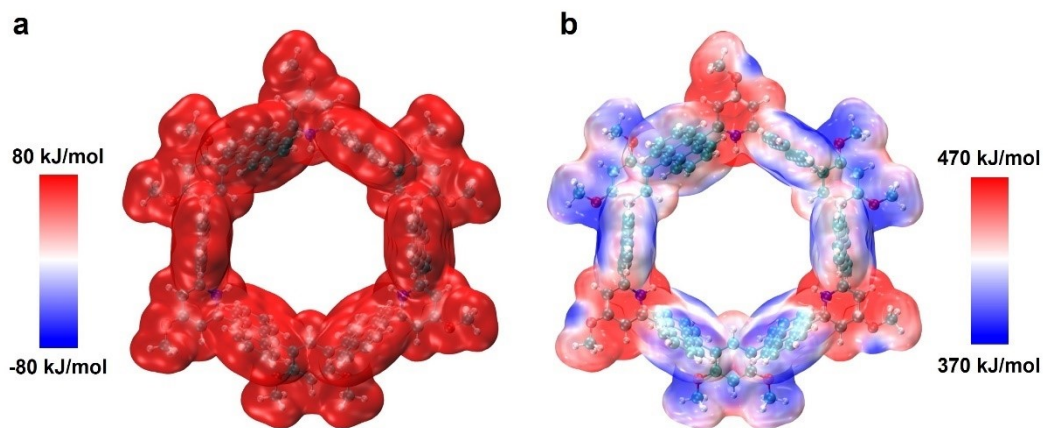

**Figure S25.** Electrostatic potential surface (EPS) of  $(1+3H)^{3+}$  with different scalebars: a) share the same scalebar with **1** and b) scalebar from 370 kJ/mol to 470 kJ/mol

## 9. Atomic Coordinates Information

For nanotube 1:

|   |             |             |             |
|---|-------------|-------------|-------------|
| H | 4.93130800  | -5.08010100 | 4.56563600  |
| C | 4.32761700  | -5.48580700 | 3.75960100  |
| H | 5.75746400  | -5.01766000 | 2.25863000  |
| C | 4.78718100  | -5.45033600 | 2.47731000  |
| C | 2.28899300  | -6.57740600 | 3.05337400  |
| C | 4.01106700  | -5.97686200 | 1.39225500  |
| C | 3.05350200  | -6.05154400 | 4.05130200  |
| C | 2.73825500  | -6.57259900 | 1.69114500  |
| C | 4.46919700  | -5.92831900 | 0.06396200  |
| H | 2.69370100  | -6.06295300 | 5.07563800  |
| H | 1.31989300  | -7.00736800 | 3.28409200  |
| C | 3.68274300  | -6.46152200 | -0.97279200 |
| C | 4.11072300  | -6.41389600 | -2.33943700 |
| C | 2.42137600  | -7.07572700 | -0.67329400 |
| H | 0.71425100  | -8.11565100 | -1.53137900 |
| C | 1.96750600  | -7.12333300 | 0.65519600  |
| C | 3.35177100  | -6.94795700 | -3.33764200 |
| H | 5.05713700  | -5.93592700 | -2.56974500 |
| H | 3.69294500  | -6.89946400 | -4.36721500 |
| C | 2.10852000  | -7.57450100 | -3.03791900 |
| H | 1.51627100  | -8.00321300 | -3.84059900 |
| C | 1.66100500  | -7.63520800 | -1.75209300 |
| C | -0.73805500 | 7.67359400  | 0.83733800  |
| C | 1.76264400  | 8.82323400  | 1.38271200  |
| C | -0.64971500 | 8.96439100  | 1.37927600  |
| C | 0.44602600  | 6.98765600  | 0.58314500  |
| C | 1.70144000  | 7.53044700  | 0.84166600  |
| C | 0.59368900  | 9.53770400  | 1.65464200  |
| H | 0.65132000  | 10.53408100 | 2.07009100  |
| C | 6.92226300  | -6.08770600 | -0.48334800 |

|   |            |             |             |
|---|------------|-------------|-------------|
| C | 7.13887100 | -3.29213500 | -0.56481000 |
| C | 8.15410500 | -5.49299500 | -0.76594000 |
| C | 5.78516800 | -5.30099700 | -0.24563200 |
| C | 5.92532200 | -3.91675400 | -0.29337200 |
| C | 8.25971700 | -4.10089500 | -0.80307600 |
| H | 9.02446500 | -6.10814500 | -0.94742200 |
| H | 2.68919400 | 7.81922500  | -3.93656200 |
| C | 3.21058400 | 7.29963200  | -3.13846800 |
| H | 1.86806300 | 7.96436300  | -1.63081400 |
| C | 2.75340600 | 7.38018700  | -1.85743500 |
| C | 5.04574900 | 5.88433100  | -2.44818000 |
| C | 3.42079900 | 6.70327000  | -0.78365300 |
| C | 4.37144600 | 6.53155200  | -3.43986600 |
| C | 4.60872700 | 5.95289300  | -1.08350600 |
| C | 2.94354400 | 6.76505400  | 0.53705400  |
| H | 4.71814300 | 6.46413400  | -4.46652400 |
| H | 5.92898000 | 5.30150400  | -2.68735400 |
| C | 3.62774100 | 6.09440500  | 1.56622700  |
| C | 3.16136800 | 6.12608500  | 2.92069500  |
| C | 4.82494900 | 5.36034300  | 1.27226300  |
| H | 6.42046900 | 4.16267000  | 2.14011000  |
| C | 5.29964200 | 5.30150600  | -0.04899900 |
| C | 3.83786800 | 5.48779200  | 3.91690600  |
| H | 2.24823100 | 6.66881400  | 3.14178800  |
| H | 3.46700800 | 5.52234400  | 4.93673200  |
| C | 5.03517300 | 4.77302900  | 3.62807600  |
| H | 5.56865000 | 4.27327700  | 4.43087700  |
| C | 5.51008200 | 4.71216900  | 2.35200000  |
| H | 6.74385700 | -1.63717700 | -5.15319900 |
| C | 6.88986900 | -1.10257800 | -4.21958000 |
| H | 6.89222700 | -2.87018200 | -3.03624800 |
| C | 6.97460800 | -1.78827000 | -3.04476500 |
| C | 7.16817700 | 1.00680900  | -3.06950100 |
| C | 7.16478600 | -1.10673000 | -1.79865900 |

|   |             |             |             |
|---|-------------|-------------|-------------|
| C | 6.98681900  | 0.31849300  | -4.23176300 |
| C | 7.26809500  | 0.32492600  | -1.81205100 |
| C | 7.24955900  | -1.80585300 | -0.58241600 |
| H | 6.91193300  | 0.85244100  | -5.17413900 |
| H | 7.23591300  | 2.08982200  | -3.08599900 |
| C | 7.42925300  | -1.10543400 | 0.62329700  |
| C | 7.52513600  | -1.78433800 | 1.88236500  |
| C | 7.53277700  | 0.32623600  | 0.61137500  |
| H | 7.81216200  | 2.09038600  | 1.85396500  |
| C | 7.45447900  | 1.01908900  | -0.60662300 |
| C | 7.70250700  | -1.09645500 | 3.04549800  |
| H | 7.45508100  | -2.86683600 | 1.89440400  |
| H | 7.77143900  | -1.63005000 | 3.98851100  |
| C | 7.80380400  | 0.32419600  | 3.03288400  |
| H | 7.94779700  | 0.85999600  | 3.96611300  |
| C | 7.72459700  | 1.00904500  | 1.85738700  |
| C | 6.55141700  | 4.54177800  | -0.34882300 |
| C | 8.80985700  | 3.09801600  | -0.87113600 |
| N | 6.45552800  | 3.20022800  | -0.35916000 |
| C | 7.73550300  | 5.22306700  | -0.58607600 |
| C | 8.89561300  | 4.49042600  | -0.85756400 |
| C | 7.57111800  | 2.50995300  | -0.61472400 |
| H | -4.92454900 | 4.79822000  | 4.39272400  |
| C | -4.34374500 | 5.25235900  | 3.59556000  |
| H | -5.79910500 | 4.83312200  | 2.10883500  |
| C | -4.83199000 | 5.27380900  | 2.32336600  |
| C | -2.33359400 | 6.39913700  | 2.89898800  |
| C | -4.08571200 | 5.86375700  | 1.25051900  |
| C | -3.07127500 | 5.82070600  | 3.88819600  |
| C | -2.80995300 | 6.44932000  | 1.54848000  |
| C | -4.57494400 | 5.89344400  | -0.06652000 |
| H | -2.69202300 | 5.79131600  | 4.90508500  |
| H | -1.36338400 | 6.83047200  | 3.12232700  |
| C | -3.82055000 | 6.48402600  | -1.09354200 |



|   |             |             |             |
|---|-------------|-------------|-------------|
| C | -4.27243600 | 6.49871800  | -2.45508200 |
| C | -2.55069600 | 7.08295500  | -0.78953900 |
| H | -0.86506100 | 8.16943100  | -1.62420600 |
| C | -2.06059200 | 7.05999500  | 0.52762500  |
| C | -3.53399100 | 7.08515800  | -3.43890300 |
| H | -5.21902100 | 6.02825600  | -2.69927700 |
| H | -3.89360600 | 7.08212800  | -4.46332200 |
| C | -2.28831200 | 7.70374200  | -3.13265700 |
| H | -1.71476600 | 8.17577100  | -3.92448500 |
| C | -1.81555700 | 7.70028500  | -1.85474900 |
| C | 0.65484200  | -7.76942500 | 0.96189200  |
| C | -1.77261700 | -8.90776800 | 1.47620400  |
| C | 0.62091300  | -9.05368300 | 1.48308400  |
| N | -0.44922600 | -7.04962800 | 0.69480900  |
| C | -1.62943800 | -7.62232000 | 0.95273300  |
| C | -0.61917400 | -9.64253200 | 1.75103400  |
| C | -6.99801500 | 6.15054000  | -0.60237800 |
| C | -7.20160700 | 3.42996700  | -0.64554200 |
| C | -8.24027400 | 5.57857800  | -0.87681600 |
| C | -5.91424700 | 5.30249000  | -0.37005400 |
| N | -5.99684700 | 3.96805800  | -0.38758800 |
| C | -8.33775800 | 4.18327800  | -0.89596900 |
| H | -2.47448100 | -7.72258100 | -3.85885800 |
| C | -3.01642300 | -7.22940900 | -3.05763600 |
| H | -1.70984200 | -7.94397900 | -1.54471400 |
| C | -2.58978700 | -7.35141200 | -1.76914300 |
| C | -4.86815800 | -5.83785500 | -2.36601200 |
| C | -3.28476100 | -6.70932300 | -0.69214700 |
| C | -4.17167400 | -6.45428500 | -3.36221900 |
| C | -4.46050400 | -5.94553200 | -0.99652700 |
| C | -2.85124500 | -6.81932700 | 0.63928700  |
| H | -4.49620900 | -6.35883400 | -4.39386100 |
| H | -5.74777400 | -5.24720400 | -2.59980700 |
| C | -3.55965800 | -6.18809000 | 1.67384600  |

|   |             |             |             |
|---|-------------|-------------|-------------|
| C | -3.12680400 | -6.25761700 | 3.03965400  |
| C | -4.74861900 | -5.44114000 | 1.36975300  |
| H | -6.37470400 | -4.28499900 | 2.22987100  |
| C | -5.18529800 | -5.32775200 | 0.03816700  |
| C | -3.83217300 | -5.65176000 | 4.03588300  |
| H | -2.21832400 | -6.80219100 | 3.27512700  |
| H | -3.48614900 | -5.71464000 | 5.06303500  |
| C | -5.02612000 | -4.93444000 | 3.73855500  |
| H | -5.58419800 | -4.46556000 | 4.54322100  |
| C | -5.46581400 | -4.83342800 | 2.45276200  |
| H | -6.68143300 | 1.70147100  | -5.19767300 |
| C | -6.83902400 | 1.18154600  | -4.25765900 |
| H | -6.88527100 | 2.97063700  | -3.11294700 |
| C | -6.95319400 | 1.88765100  | -3.09750500 |
| C | -7.11201700 | -0.90961700 | -3.07439900 |
| C | -7.15995800 | 1.22437600  | -1.84321300 |
| C | -6.92129000 | -0.24047500 | -4.24632700 |
| C | -7.23672700 | -0.20899400 | -1.83054200 |
| C | -7.27919400 | 1.93703400  | -0.64010300 |
| H | -6.82769800 | -0.78956400 | -5.17826900 |
| H | -7.16693800 | -1.99328200 | -3.06640300 |
| C | -7.46505700 | 1.25969400  | 0.57504700  |
| C | -7.58931000 | 1.96150000  | 1.81914900  |
| C | -7.54032500 | -0.17374700 | 0.58647600  |
| H | -7.80420900 | -1.91789000 | 1.85407900  |
| C | -7.42868900 | -0.89164600 | -0.61712800 |
| C | -7.77096300 | 1.29216800  | 2.99226100  |
| H | -7.54343600 | 3.04551300  | 1.81595400  |
| H | -7.86179000 | 1.84203800  | 3.92401000  |
| C | -7.84761500 | -0.13004100 | 3.00418800  |
| H | -7.99659900 | -0.65057100 | 3.94524800  |
| C | -7.73933800 | -0.83505000 | 1.84278100  |
| C | -6.41177000 | -4.54203900 | -0.27713200 |
| C | -8.71399800 | -3.04352100 | -0.84959300 |

|   |              |             |             |
|---|--------------|-------------|-------------|
| C | -6.37892400  | -3.15097800 | -0.32183100 |
| C | -7.63576800  | -5.18132800 | -0.52478300 |
| C | -8.78216700  | -4.43804400 | -0.81477800 |
| C | -7.50353100  | -2.38026500 | -0.60060800 |
| H | -9.72071400  | -4.94007000 | -1.00443500 |
| O | -9.77894800  | -2.25115600 | -1.11572300 |
| O | -7.62079300  | -6.53366900 | -0.46262600 |
| O | 3.00435800   | 9.31096600  | 1.61267900  |
| O | -1.82700300  | 9.59312900  | 1.60632600  |
| C | -11.02953100 | -2.86212800 | -1.37929300 |
| H | -10.97963100 | -3.50709300 | -2.26404200 |
| H | -11.72594800 | -2.04507200 | -1.56679000 |
| H | -11.37741800 | -3.44553800 | -0.51912400 |
| C | -8.81993600  | -7.23858900 | -0.73006300 |
| H | -9.60267100  | -6.98391700 | -0.00639600 |
| H | -8.57088400  | -8.29536800 | -0.63513900 |
| H | -9.18054800  | -7.04025700 | -1.74586800 |
| C | 3.13172300   | 10.60375500 | 2.17755000  |
| H | 4.20252500   | 10.77815000 | 2.28195600  |
| H | 2.65732700   | 10.65611700 | 3.16415800  |
| H | 2.70159100   | 11.36975100 | 1.52220200  |
| C | -1.80450000  | 10.89339700 | 2.16800500  |
| H | -1.32942100  | 10.89273000 | 3.15573100  |
| H | -2.84789700  | 11.19145400 | 2.26919800  |
| H | -1.28649800  | 11.60251000 | 1.51211500  |
| H | 5.05219600   | -3.29798600 | -0.10341800 |
| H | -5.43717600  | -2.64555300 | -0.12400300 |
| H | 0.38807700   | 5.98890600  | 0.15831100  |
| O | 9.41698000   | -3.44730500 | -1.06115400 |
| O | 6.73963300   | -7.42759400 | -0.41909000 |
| C | 10.58321900  | -4.20957400 | -1.31723000 |
| H | 11.37705800  | -3.48568400 | -1.50087300 |
| H | 10.45843400  | -4.84414300 | -2.20208800 |
| H | 10.85086300  | -4.83079300 | -0.45484500 |

|   |              |              |             |
|---|--------------|--------------|-------------|
| C | 7.84427800   | -8.27616300  | -0.67608300 |
| H | 8.23401300   | -8.12702300  | -1.68953400 |
| H | 7.46572800   | -9.29369600  | -0.58080000 |
| H | 8.64723000   | -8.11805800  | 0.05299300  |
| H | 1.53524400   | -9.60096000  | 1.68376300  |
| H | -2.76598200  | -9.30027700  | 1.65477300  |
| H | -9.29086700  | 3.70865400   | -1.10102200 |
| H | -6.84965400  | 7.22265200   | -0.56724100 |
| H | 7.77178900   | 6.30662100   | -0.56601200 |
| H | 9.66645900   | 2.46601800   | -1.06978400 |
| O | 10.01472100  | 5.19641400   | -1.08167800 |
| O | -9.36728600  | 6.26460100   | -1.12256600 |
| O | -0.59908800  | -10.88674100 | 2.25374900  |
| C | 11.21448700  | 4.48431800   | -1.35798500 |
| H | 11.98181400  | 5.24326900   | -1.50484200 |
| H | 11.11444200  | 3.88336200   | -2.26789500 |
| H | 11.49187600  | 3.84040700   | -0.51686000 |
| C | -9.30398900  | 7.68545200   | -1.11604800 |
| H | -8.99938700  | 8.06104200   | -0.13361300 |
| H | -10.31345300 | 8.02757000   | -1.34030300 |
| H | -8.61370000  | 8.05161900   | -1.88323300 |
| C | -1.84212600  | -11.51532800 | 2.54089900  |
| H | -2.40389100  | -10.95043900 | 3.29225900  |
| H | -1.59195900  | -12.49899100 | 2.93608200  |
| H | -2.44500200  | -11.62716900 | 1.63366300  |

For C<sub>60</sub>:

|   |             |            |             |
|---|-------------|------------|-------------|
| C | -0.11214170 | 4.19728824 | -0.18922765 |
| C | 0.28169987  | 3.50667625 | -1.46022228 |
| C | -0.75412343 | 2.46615466 | -1.76530072 |
| C | -1.59406271 | 3.39918256 | 1.61933389  |
| C | -0.54289164 | 3.81509356 | 2.60512719  |
| C | 0.61294396  | 4.37306927 | 2.16959114  |
| C | 0.83892643  | 4.57266864 | 0.70111415  |

|   |             |             |             |
|---|-------------|-------------|-------------|
| C | 1.58859872  | 3.25916834  | -1.71936640 |
| C | 2.64057942  | 3.67459267  | -0.73485784 |
| C | 2.28475208  | 4.29796471  | 0.41473910  |
| C | -0.38223331 | 1.27625795  | -2.29772948 |
| C | 1.06355520  | 1.00187159  | -2.58390231 |
| C | -2.21658577 | 2.12780310  | 2.11285320  |
| C | -1.94138313 | 0.04538481  | -0.82603336 |
| C | -1.00594340 | 0.00445854  | -1.80566083 |
| C | -0.51472418 | 2.79944024  | 3.70773719  |
| C | -1.54915015 | 1.75711806  | 3.40322010  |
| C | 2.95263037  | 3.92753304  | 1.70573994  |
| C | 1.91942031  | 3.97427693  | 2.79071751  |
| C | -1.91112560 | -0.96897102 | 0.27772230  |
| C | -2.30331262 | -0.27891501 | 1.54957656  |
| C | 1.33438391  | -0.43860944 | -2.26771742 |
| C | 0.05531455  | -1.05558795 | -1.78673724 |
| C | 1.94452488  | 3.05614104  | 3.78769177  |
| C | 0.66561872  | 2.43923248  | 4.26890491  |
| C | -1.70047572 | -0.61433467 | 2.71599005  |
| C | -1.30409571 | 0.45515353  | 3.68916137  |
| C | 0.08036594  | -1.97414012 | -0.79029879 |
| C | -0.95299736 | -1.92798808 | 0.29456955  |
| C | 3.54973601  | 0.24288429  | -1.40318803 |
| C | 2.51492401  | -0.79916984 | -1.70732246 |
| C | 4.30523711  | 2.28000204  | 0.45029161  |
| C | 3.91207317  | 2.96979925  | 1.72261572  |
| C | 0.93646906  | 0.99815294  | 4.58421469  |
| C | 0.00112341  | 0.05654493  | 4.30941398  |
| C | 4.57624702  | 0.83894342  | 0.76684902  |
| C | 4.21796160  | -0.12819028 | -0.11315444 |
| C | 2.54290781  | -1.81466559 | -0.60506459 |
| C | 1.38691664  | -2.37252094 | -0.16955229 |
| C | -0.28515961 | -2.29847439 | 1.58537884  |
| C | -0.64058760 | -1.67467922 | 2.73494808  |

|   |             |             |             |
|---|-------------|-------------|-------------|
| C | 1.16091564  | -2.57383352 | 1.29867244  |
| C | 3.59610973  | -1.40061101 | 0.38012048  |
| C | -2.57616076 | 1.16128337  | 1.23288912  |
| C | -2.35184134 | 1.36250350  | -0.23553503 |
| C | -1.78853035 | 2.51200709  | -0.68170575 |
| C | -1.39163556 | 3.58247590  | 0.29207617  |
| C | 1.99901839  | 1.94337182  | -2.30909483 |
| C | 3.30447053  | 1.54490012  | -1.68889547 |
| C | 3.70119473  | 2.61474519  | -0.71593502 |
| C | 0.41130038  | -1.25956085 | 3.71961080  |
| C | 2.11195047  | -2.19795608 | 2.18879427  |
| C | 1.71801728  | -1.50725814 | 3.46010338  |
| C | 2.38218246  | 0.72360652  | 4.29779696  |
| C | 3.00574715  | 1.99558739  | 3.80617455  |
| C | 2.75320206  | -0.46609970 | 3.76445813  |
| C | 3.94044159  | 1.95466779  | 2.82591591  |
| C | 4.34983824  | 0.63776647  | 2.23471809  |
| C | 3.39145479  | -1.58270514 | 1.70726575  |
| C | 3.78640800  | -0.51150126 | 2.68040432  |

For  $C_{70}$ :

|   |             |             |             |
|---|-------------|-------------|-------------|
| C | 2.41701857  | -0.24953628 | 2.92455252  |
| C | 2.88979621  | -1.44476163 | 2.22282348  |
| C | 1.77578258  | -2.39536649 | 2.20721868  |
| C | 0.63480288  | -1.78841103 | 2.91648151  |
| C | 1.02564425  | -0.48144652 | 3.35252176  |
| C | 2.80277867  | 0.99844401  | 2.49687522  |
| C | 3.72438551  | -1.32402889 | 1.12106449  |
| C | 1.55334399  | -3.17693509 | 1.09783821  |
| C | -0.70262165 | -2.07986783 | 2.54593054  |
| C | 0.09501414  | 0.58451691  | 3.43632984  |
| C | 0.17517556  | -3.40108240 | 0.62469290  |
| C | 2.43010591  | -3.05776945 | -0.06899646 |
| C | -1.66068913 | -1.09160170 | 2.88711307  |

|   |             |             |             |
|---|-------------|-------------|-------------|
| C | 0.19104611  | -3.40848903 | -0.80754570 |
| C | 3.48628772  | -2.15740262 | -0.06345756 |
| C | 4.13622978  | 0.00949423  | 0.66355895  |
| C | -0.94157101 | -2.91866463 | 1.35343543  |
| C | -1.59326549 | -1.12918567 | -3.14219709 |
| C | 1.57901882  | -3.18999576 | -1.25341987 |
| C | 3.74988958  | -1.33861725 | -1.25353703 |
| C | 4.15243027  | -0.00035132 | -0.80478123 |
| C | 3.68795780  | 1.13605349  | 1.33759027  |
| C | 1.82120822  | 2.09879820  | 2.46910130  |
| C | 3.22838636  | 2.31071691  | 0.59178220  |
| C | 2.07966262  | 2.89750854  | 1.30860723  |
| C | 2.94119419  | -1.47451981 | -2.37330038 |
| C | -2.92942243 | -0.96691526 | 2.14675483  |
| C | -1.26903123 | 0.21503456  | 3.32394873  |
| C | -2.28644048 | 1.17787781  | 2.86480931  |
| C | 3.71722691  | 1.11755022  | -1.50258472 |
| C | 0.50880260  | 1.92557420  | 2.97624176  |
| C | 2.85939778  | 0.96435008  | -2.67991075 |
| C | -3.32668378 | 0.44252622  | 2.14246162  |
| C | -1.90176990 | 2.42629563  | 2.43601952  |
| C | -2.53162412 | 3.02333308  | 1.25650450  |
| C | -0.47439343 | 2.79447091  | 2.43882871  |
| C | 1.82625032  | -2.42387993 | -2.36801855 |
| C | -0.21697601 | 3.59224530  | 1.27817997  |
| C | 2.48445691  | -0.28975074 | -3.10159829 |
| C | 1.87691481  | 2.06251775  | -2.68621701 |
| C | 0.70184641  | -1.82640326 | -3.11078248 |
| C | 3.24352167  | 2.30192633  | -0.78323207 |
| C | -2.87764196 | -0.99438507 | -2.43001024 |
| C | 1.10245894  | -0.52639790 | -3.55738257 |
| C | -1.47948576 | 3.73655866  | 0.53058587  |
| C | 1.03376474  | 3.55301850  | 0.61114141  |
| C | 1.04927249  | 3.54102227  | -0.86515315 |

|   |             |             |             |
|---|-------------|-------------|-------------|
| C | -3.92599485 | 0.99871262  | 1.02096003  |
| C | -1.19323199 | 0.17117254  | -3.58996603 |
| C | -0.18574005 | 3.57177402  | -1.56081354 |
| C | -3.27771129 | 0.41476008  | -2.45587192 |
| C | -1.46406078 | 3.72680756  | -0.84448598 |
| C | -3.51462373 | 2.33165481  | 0.56249213  |
| C | -3.90080739 | 0.98413067  | -1.35500645 |
| C | -3.50003468 | 2.32333573  | -0.90515319 |
| C | -4.16395644 | 0.16594030  | -0.16400129 |
| C | -3.78601429 | -1.16899646 | -0.15055109 |
| C | -3.12364556 | -1.75981773 | -1.31521745 |
| C | -2.22180968 | 1.14099103  | -3.16651596 |
| C | -2.50046765 | 3.00434874  | -1.58567365 |
| C | 2.11025266  | 2.87549038  | -1.53003495 |
| C | -0.41890348 | 2.75930279  | -2.71733089 |
| C | -1.84635752 | 2.39511042  | -2.74564753 |
| C | 0.17346520  | 0.53835996  | -3.67621441 |
| C | 0.57632636  | 1.88411041  | -3.22172110 |
| C | -3.15140657 | -1.74688390 | 1.03619652  |
| C | -2.12002313 | -2.70321435 | 0.59458001  |
| C | -0.64324929 | -2.11117465 | -2.76427320 |
| C | -2.10304807 | -2.71020049 | -0.83742061 |
| C | -0.90818532 | -2.93382048 | -1.56655939 |

For complex  $1 \supset C_{60}$ :

|   |             |            |             |
|---|-------------|------------|-------------|
| H | 2.95243641  | 1.78376098 | -7.32726588 |
| C | 1.91146834  | 2.00845864 | -7.11403359 |
| H | 2.37686476  | 3.90917704 | -6.29562847 |
| C | 1.56450205  | 3.22121183 | -6.52041163 |
| C | -0.40641661 | 1.40526930 | -7.13148753 |
| C | 0.22265614  | 3.56187113 | -6.20117852 |
| C | 0.92172842  | 1.09402355 | -7.41651895 |
| C | -0.79143611 | 2.63221807 | -6.52808987 |
| C | -0.12959012 | 4.79143800 | -5.56214340 |



|   |             |             |             |
|---|-------------|-------------|-------------|
| H | 1.17342857  | 0.13799243  | -7.86622046 |
| H | -1.15303731 | 0.64901530  | -7.36835801 |
| C | -1.48535811 | 5.07449097  | -5.21061044 |
| C | -1.86645624 | 6.25786297  | -4.52232178 |
| C | -2.49882883 | 4.14960628  | -5.54971984 |
| H | -4.64409392 | 3.76744600  | -5.40752824 |
| C | -2.15245213 | 2.94778382  | -6.23907606 |
| C | -3.18758193 | 6.53267516  | -4.17272072 |
| H | -1.11873068 | 6.99592351  | -4.23942038 |
| H | -3.43225344 | 7.44790879  | -3.64175887 |
| C | -4.17727090 | 5.62841000  | -4.50310409 |
| H | -5.21163026 | 5.82024371  | -4.23336094 |
| C | -3.83556603 | 4.45954533  | -5.18094848 |
| C | 3.85458082  | -2.75267490 | 6.46635382  |
| C | 6.13100636  | -1.18821021 | 7.04791451  |
| C | 4.76112682  | -3.16546378 | 7.46211990  |
| C | 4.10738259  | -1.55990232 | 5.77581238  |
| C | 5.23178912  | -0.76936292 | 6.04880578  |
| C | 5.88871222  | -2.38052419 | 7.74560811  |
| H | 6.57874391  | -2.69653220 | 8.51628488  |
| C | 1.25860019  | 6.86227640  | -6.04515246 |
| C | 2.65744189  | 6.47685836  | -3.62539600 |
| C | 2.26457712  | 7.75788249  | -5.65306839 |
| C | 0.93323223  | 5.77005476  | -5.21747096 |
| C | 1.63853088  | 5.59878304  | -4.01874274 |
| C | 2.96525193  | 7.57439195  | -4.45199096 |
| H | 2.50437482  | 8.60068100  | -6.28718747 |
| H | 2.73447684  | 2.92204572  | 8.17052542  |
| C | 3.34914308  | 2.91999697  | 7.27513110  |
| H | 3.83992139  | 0.86707911  | 7.48537227  |
| C | 3.98822079  | 1.75023251  | 6.86732018  |
| C | 4.29118139  | 4.04031163  | 5.37931974  |
| C | 4.79417212  | 1.68436363  | 5.69898543  |
| C | 3.49665029  | 4.06935788  | 6.52412037  |

|   |            |             |             |
|---|------------|-------------|-------------|
| C | 4.96292778 | 2.86653809  | 4.94277761  |
| C | 5.42352720 | 0.47684042  | 5.26555327  |
| H | 2.99556438 | 4.98726106  | 6.81743246  |
| H | 4.36406344 | 4.96353018  | 4.80698299  |
| C | 6.18931556 | 0.43761610  | 4.06002937  |
| C | 6.77920390 | -0.75772549 | 3.56723427  |
| C | 6.36894664 | 1.62351113  | 3.31245692  |
| H | 7.27376278 | 2.43094615  | 1.49769915  |
| C | 5.78493410 | 2.84212807  | 3.77563180  |
| C | 7.51282125 | -0.80168385 | 2.38294621  |
| H | 6.66404472 | -1.69381265 | 4.10969974  |
| H | 7.93692491 | -1.74006390 | 2.03810777  |
| C | 7.68688236 | 0.35631068  | 1.65169678  |
| H | 8.24617679 | 0.34206930  | 0.72091578  |
| C | 7.12756162 | 1.54633533  | 2.11377972  |
| H | 0.15164921 | 8.32018078  | 0.21596927  |
| C | 1.09349814 | 7.77974546  | 0.19127594  |
| H | 1.07001929 | 7.61794509  | -1.92439482 |
| C | 1.63223415 | 7.36802777  | -1.02684778 |
| C | 2.96643501 | 6.78528114  | 1.30577753  |
| C | 2.84999236 | 6.64269495  | -1.11847605 |
| C | 1.76095861 | 7.48226014  | 1.36342699  |
| C | 3.54217577 | 6.35573325  | 0.08046678  |
| C | 3.38572177 | 6.19139434  | -2.36377040 |
| H | 1.34852165 | 7.78026609  | 2.32304247  |
| H | 3.44841403 | 6.55190331  | 2.25388221  |
| C | 4.58812752 | 5.41933073  | -2.41128823 |
| C | 5.12033409 | 4.90281733  | -3.62387895 |
| C | 5.28410555 | 5.14380670  | -1.21332834 |
| H | 7.02480171 | 4.11125935  | -0.39249419 |
| C | 4.77799892 | 5.64520730  | 0.02399276  |
| C | 6.28618617 | 4.14006846  | -3.67012733 |
| H | 4.61641071 | 5.08801010  | -4.57026839 |
| H | 6.65156547 | 3.75906105  | -4.61927004 |

|   |             |             |             |
|---|-------------|-------------|-------------|
| C | 6.96396809  | 3.86851602  | -2.49847916 |
| H | 7.86845984  | 3.26743064  | -2.51139477 |
| C | 6.47005931  | 4.36503512  | -1.29360340 |
| C | 6.06386411  | 4.10012962  | 3.05817263  |
| C | 6.51942018  | 6.40291614  | 1.64568706  |
| N | 5.32987741  | 4.32459898  | 1.94588645  |
| C | 7.03619501  | 4.98966824  | 3.50610190  |
| C | 7.26346233  | 6.16096113  | 2.79228144  |
| C | 5.56892778  | 5.46074723  | 1.25424445  |
| H | 2.83956804  | -7.24787801 | 2.27916070  |
| C | 2.81721292  | -6.50134237 | 3.06773295  |
| H | 0.75944840  | -6.83034323 | 3.46946814  |
| C | 1.63556599  | -6.25512912 | 3.76445044  |
| C | 3.89173244  | -4.81246276 | 4.38450996  |
| C | 1.54179502  | -5.27567812 | 4.78900911  |
| C | 3.95139934  | -5.77820719 | 3.38091971  |
| C | 2.70077288  | -4.53020748 | 5.10560688  |
| C | 0.32867138  | -5.02039958 | 5.49590575  |
| H | 4.88028404  | -5.95187448 | 2.84558584  |
| H | 4.80689949  | -4.26248056 | 4.59417596  |
| C | 0.24449765  | -3.96812667 | 6.45752828  |
| C | -0.97122167 | -3.62479675 | 7.10871878  |
| C | 1.40405385  | -3.22821080 | 6.78160178  |
| H | 2.15706604  | -1.61410326 | 8.04572644  |
| C | 2.63578856  | -3.52735145 | 6.12161623  |
| C | -1.05417823 | -2.60630356 | 8.05647203  |
| H | -1.89559859 | -4.14457241 | 6.86240030  |
| H | -2.00620801 | -2.37137959 | 8.52360969  |
| C | 0.08259180  | -1.89566892 | 8.38734659  |
| H | 0.03891813  | -1.09721089 | 9.12236183  |
| C | 1.28846808  | -2.20377150 | 7.75948868  |
| C | -3.22236136 | 2.04020908  | -6.69229167 |
| C | -5.25103209 | 0.35255808  | -7.42113427 |
| C | -3.82125197 | 2.19891410  | -7.93858042 |

|   |             |             |             |
|---|-------------|-------------|-------------|
| N | -3.59247095 | 1.07332257  | -5.82255063 |
| C | -4.59701136 | 0.24747272  | -6.19307902 |
| C | -4.85022985 | 1.34130080  | -8.30908792 |
| C | -1.12177159 | -6.94976301 | 6.13350501  |
| C | -2.70712420 | -6.34926854 | 3.98324665  |
| C | -2.25112196 | -7.72121015 | 5.89783341  |
| C | -0.84227386 | -5.88896775 | 5.27147785  |
| N | -1.61407174 | -5.58480662 | 4.20409809  |
| C | -3.05792077 | -7.41397457 | 4.80865996  |
| H | -7.32345218 | 2.29723552  | -2.62674018 |
| C | -7.06351095 | 1.25666393  | -2.79749345 |
| H | -5.87439479 | 1.71984914  | -4.49116742 |
| C | -6.23901284 | 0.90777308  | -3.86552780 |
| C | -7.17052763 | -1.05663033 | -2.18741171 |
| C | -5.84577222 | -0.43240344 | -4.12564317 |
| C | -7.53242979 | 0.26913985  | -1.95443442 |
| C | -6.32588343 | -1.44394879 | -3.26268301 |
| C | -4.98878939 | -0.78406555 | -5.21249102 |
| H | -8.17126347 | 0.52074125  | -1.11300112 |
| H | -7.55940727 | -1.80105184 | -1.49572171 |
| C | -4.54777095 | -2.12995318 | -5.39434561 |
| C | -3.61632291 | -2.49766830 | -6.40255736 |
| C | -5.04117773 | -3.14518799 | -4.54282736 |
| H | -4.96501908 | -5.29138409 | -4.14612884 |
| C | -5.94584494 | -2.80282127 | -3.49150572 |
| C | -3.19473557 | -3.81262976 | -6.59154648 |
| H | -3.17845846 | -1.74185504 | -7.05259810 |
| H | -2.47373509 | -4.04841287 | -7.36898702 |
| C | -3.69539361 | -4.80811825 | -5.77573728 |
| H | -3.37848317 | -5.83880350 | -5.90625316 |
| C | -4.60249958 | -4.47701334 | -4.77034619 |
| H | -5.59827924 | -2.49682326 | 5.05108714  |
| C | -5.54235408 | -3.10118974 | 4.15047450  |
| H | -3.95819528 | -4.28772032 | 4.91502194  |

|   |             |             |             |
|---|-------------|-------------|-------------|
| C | -4.61261274 | -4.13537262 | 4.05859071  |
| C | -6.27674525 | -3.62756780 | 1.93190489  |
| C | -4.47921704 | -4.94488528 | 2.89848211  |
| C | -6.38034552 | -2.84760845 | 3.08268287  |
| C | -5.33211914 | -4.68116817 | 1.80219377  |
| C | -3.51896997 | -5.99703951 | 2.80367268  |
| H | -7.10877343 | -2.04369970 | 3.13323741  |
| H | -6.95435889 | -3.39052739 | 1.11431792  |
| C | -3.35847624 | -6.74056762 | 1.59474568  |
| C | -2.35711107 | -7.73696115 | 1.43790552  |
| C | -4.21513610 | -6.48255619 | 0.50046529  |
| H | -4.67882665 | -7.09046209 | -1.54518980 |
| C | -5.21250170 | -5.46583932 | 0.61332380  |
| C | -2.20304877 | -8.46938622 | 0.26204616  |
| H | -1.65539073 | -7.94626678 | 2.24341946  |
| H | -1.41991854 | -9.21789653 | 0.18403011  |
| C | -3.05028771 | -8.22842536 | -0.80136462 |
| H | -2.94623510 | -8.78774041 | -1.72648946 |
| C | -4.03722245 | -7.25135284 | -0.68119942 |
| C | -6.45320344 | -3.86369218 | -2.58447788 |
| C | -7.32877110 | -5.82298277 | -0.74948943 |
| C | -5.67834959 | -4.21174956 | -1.47061696 |
| C | -7.68226053 | -4.51988009 | -2.78512668 |
| C | -8.10788165 | -5.49456437 | -1.86942502 |
| C | -6.09550037 | -5.17683530 | -0.54484516 |
| H | -9.04967106 | -6.00183419 | -2.03004745 |
| O | -7.67518245 | -6.75802923 | 0.19280579  |
| O | -8.38565413 | -4.14028854 | -3.90064952 |
| O | 7.20559701  | -0.36345834 | 7.26622522  |
| O | 4.45128216  | -4.34035423 | 8.10047606  |
| C | -8.94271481 | -7.38661807 | 0.07333211  |
| H | -9.75440533 | -6.65294213 | 0.11653384  |
| H | -9.06167592 | -8.06399650 | 0.92443785  |
| H | -8.99919903 | -7.98767770 | -0.83998540 |

|   |              |             |             |
|---|--------------|-------------|-------------|
| C | -9.66688880  | -4.71658378 | -4.10731259 |
| H | -9.59087831  | -5.79638298 | -4.27124543 |
| H | -10.09106954 | -4.27248670 | -5.01298425 |
| H | -10.34294717 | -4.48751182 | -3.27698482 |
| C | 8.16955266   | -0.76408487 | 8.22863259  |
| H | 8.95797216   | -0.00553622 | 8.24810064  |
| H | 8.63221519   | -1.71719849 | 7.95218843  |
| H | 7.72987564   | -0.81195230 | 9.23016201  |
| C | 5.36218033   | -4.82988860 | 9.07359203  |
| H | 6.34490688   | -5.02653490 | 8.63256349  |
| H | 4.97092837   | -5.78012268 | 9.44959689  |
| H | 5.43812821   | -4.14289879 | 9.92267164  |
| H | 1.39546904   | 4.75587879  | -3.37719370 |
| H | -4.72462855  | -3.71572144 | -1.31687227 |
| H | 3.40979936   | -1.23266347 | 5.00917495  |
| O | 3.96428459   | 8.39964924  | -3.99998999 |
| O | 0.53469060   | 6.96637761  | -7.20632591 |
| C | 4.33158027   | 9.50646271  | -4.81014733 |
| H | 5.14107139   | 10.03893231 | -4.30162772 |
| H | 3.49632833   | 10.20473726 | -4.92634293 |
| H | 4.71107588   | 9.17570739  | -5.78248204 |
| C | 0.84437575   | 8.03102596  | -8.09317177 |
| H | 0.64973538   | 9.00202844  | -7.62631026 |
| H | 0.18689436   | 7.94336096  | -8.96346410 |
| H | 1.87754833   | 7.96151449  | -8.44899234 |
| H | -3.49441458  | 2.98735504  | -8.60962500 |
| H | -6.05218373  | -0.34112101 | -7.64688259 |
| H | -3.94689085  | -8.00162718 | 4.60060863  |
| H | -0.45400381  | -7.13552889 | 6.96625488  |
| H | 7.60893493   | 4.77298004  | 4.40266713  |
| H | 6.65535895   | 7.29062968  | 1.03973350  |
| O | 8.23203077   | 6.97442024  | 3.31117595  |
| O | -2.67098037  | -8.78582219 | 6.64558138  |
| O | -5.37887456  | 1.57476839  | -9.54801160 |

|   |             |             |              |
|---|-------------|-------------|--------------|
| C | 8.49293976  | 8.18807781  | 2.61581487   |
| H | 9.28040523  | 8.72089366  | 3.15741765   |
| H | 7.60662408  | 8.83092637  | 2.59800320   |
| H | 8.85939894  | 7.99090144  | 1.60295458   |
| C | -1.87708538 | -9.13163128 | 7.77458196   |
| H | -0.86768912 | -9.42800193 | 7.47078027   |
| H | -2.34517519 | -9.99273581 | 8.26108385   |
| H | -1.84751616 | -8.31314897 | 8.50141522   |
| C | -6.42475986 | 0.70943392  | -9.97450021  |
| H | -6.07861121 | -0.32768035 | -10.03573328 |
| H | -6.72656955 | 1.01998391  | -10.97939099 |
| H | -7.29934304 | 0.79698726  | -9.32147369  |
| C | -0.43557971 | 3.15662722  | -1.47254344  |
| C | 0.01025456  | 2.31172999  | -2.62653318  |
| C | -1.11413025 | 1.39440289  | -2.99476262  |
| C | -2.22403594 | 2.71801831  | 0.17517534   |
| C | -1.25111165 | 3.07662327  | 1.25927921   |
| C | 0.01517920  | 3.44207193  | 0.94220499   |
| C | 0.44347634  | 3.48304311  | -0.49362480  |
| C | 1.29228870  | 1.87891003  | -2.69581291  |
| C | 2.26540561  | 2.24121742  | -1.61440308  |
| C | 1.86115888  | 3.00079456  | -0.56750067  |
| C | -0.84900596 | 0.12701773  | -3.39498742  |
| C | 0.57002215  | -0.35403784 | -3.46912101  |
| C | -3.07267534 | 1.58515515  | 0.67041520   |
| C | -2.72481773 | -0.75783844 | -2.05246830  |
| C | -1.69677435 | -1.00531971 | -2.89990707  |
| C | -1.49901227 | 2.16533362  | 2.42376507   |
| C | -2.62414295 | 1.24315011  | 2.06019224   |
| C | 2.30980364  | 2.66263931  | 0.82218857   |
| C | 1.16881952  | 2.93500453  | 1.75629235   |
| C | -2.96509874 | -1.66329217 | -0.88560789  |
| C | -3.42109407 | -0.82866549 | 0.26975493   |
| C | 0.59810807  | -1.78421190 | -3.01889238  |

|   |             |             |             |
|---|-------------|-------------|-------------|
| C | -0.80282574 | -2.18751949 | -2.66776134 |
| C | 0.94415695  | 2.11113370  | 2.80928792  |
| C | -0.45747757 | 1.70699852  | 3.15993295  |
| C | -3.01902997 | -1.13882784 | 1.52645432  |
| C | -2.60021499 | -0.04962356 | 2.46754423  |
| C | -1.02496997 | -3.00925111 | -1.61262300 |
| C | -2.16030901 | -2.73267875 | -0.67692641 |
| C | 2.76476576  | -1.32036278 | -1.91786987 |
| C | 1.63968374  | -2.24239595 | -2.28207513 |
| C | 3.56675078  | 0.75480482  | -0.12712409 |
| C | 3.11809804  | 1.59498158  | 1.03132851  |
| C | -0.43079675 | 0.27630638  | 3.60916970  |
| C | -1.44803919 | -0.55814357 | 3.28193812  |
| C | 3.59314351  | -0.67627904 | 0.32214528  |
| C | 3.21259847  | -1.66117251 | -0.52806804 |
| C | 1.39247539  | -3.15422285 | -1.11737400 |
| C | 0.12669591  | -3.52028227 | -0.79962676 |
| C | -1.71957447 | -3.08015919 | 0.71138077  |
| C | -2.12485487 | -2.32066545 | 1.75821630  |
| C | -0.30330961 | -3.56575266 | 0.63733794  |
| C | 2.36402150  | -2.79503834 | -0.03334306 |
| C | -3.45331481 | 0.60109001  | -0.18032328 |
| C | -3.02399304 | 0.64471064  | -1.61719467 |
| C | -2.25799412 | 1.66887990  | -2.06556719 |
| C | -1.83760203 | 2.75806615  | -1.12343305 |
| C | 1.58695836  | 0.47903953  | -3.13810231 |
| C | 2.74075392  | -0.02786804 | -2.32486689 |
| C | 3.16166183  | 1.06229229  | -1.38389487 |
| C | -1.15528301 | -1.96269373 | 2.84359107  |
| C | 0.57454087  | -3.23914743 | 1.61684809  |
| C | 0.12671924  | -2.39601303 | 2.77279499  |
| C | 0.98585744  | -0.20422606 | 3.53161324  |
| C | 1.83637696  | 0.92867296  | 3.03949056  |
| C | 1.24867187  | -1.47178018 | 3.13167786  |



|   |            |             |            |
|---|------------|-------------|------------|
| C | 2.86766968 | 0.68359124  | 2.19505810 |
| C | 3.16093870 | -0.71969858 | 1.75676561 |
| C | 1.97526447 | -2.83489780 | 1.26433098 |
| C | 2.39176989 | -1.74314035 | 2.20178588 |

For complex  $1 \rightarrow C_{70}$ :

|   |             |             |             |
|---|-------------|-------------|-------------|
| H | 2.93334861  | 1.62842249  | -7.28959282 |
| C | 1.90209767  | 1.92312770  | -7.10552561 |
| H | 2.38270057  | 3.84188721  | -6.29569687 |
| C | 1.59711933  | 3.13271952  | -6.55926286 |
| C | -0.44802728 | 1.32465623  | -7.23929077 |
| C | 0.22600758  | 3.51660439  | -6.30706244 |
| C | 0.85747453  | 0.99835622  | -7.44822180 |
| C | -0.81532821 | 2.59943078  | -6.66288392 |
| C | -0.10400286 | 4.75670777  | -5.72095805 |
| H | 1.13893771  | 0.03588753  | -7.87238308 |
| H | -1.24562398 | 0.62456319  | -7.48894379 |
| C | -1.45067614 | 5.09400646  | -5.46645771 |
| C | -1.81765649 | 6.34099095  | -4.83342593 |
| C | -2.49257502 | 4.18350324  | -5.83484980 |
| H | -4.65106267 | 3.85486713  | -5.84339352 |
| C | -2.15944064 | 2.95720408  | -6.44347184 |
| C | -3.12131046 | 6.65376032  | -4.59292382 |
| H | -1.01630570 | 7.02421170  | -4.55038209 |
| H | -3.40032986 | 7.58930982  | -4.11298455 |
| C | -4.16574188 | 5.74150404  | -4.96704112 |
| H | -5.19614778 | 6.02237407  | -4.75648764 |
| C | -3.86392125 | 4.55532662  | -5.56450039 |
| C | 3.76357696  | -2.74549338 | 6.48504422  |
| C | 6.04964491  | -1.20970353 | 7.03059098  |
| C | 4.70448872  | -3.15626611 | 7.46027175  |
| C | 4.00072886  | -1.55175894 | 5.79530888  |
| C | 5.13471041  | -0.77192990 | 6.04119749  |
| C | 5.84770187  | -2.39753775 | 7.74630374  |

|   |            |             |             |
|---|------------|-------------|-------------|
| H | 6.55529689 | -2.72022586 | 8.49722870  |
| C | 1.31264290 | 6.80723702  | -6.15937944 |
| C | 2.69453901 | 6.38403566  | -3.75131058 |
| C | 2.31684150 | 7.71183107  | -5.78877746 |
| C | 0.97079508 | 5.69951954  | -5.34432323 |
| C | 1.67831359 | 5.51056172  | -4.15331733 |
| C | 2.99479858 | 7.49093032  | -4.58222692 |
| H | 2.56170462 | 8.55693741  | -6.41700981 |
| H | 2.76717976 | 2.97755190  | 8.17110295  |
| C | 3.38765580 | 2.92121008  | 7.27918951  |
| H | 3.80702337 | 0.83170005  | 7.45464934  |
| C | 3.95708486 | 1.74887514  | 6.88379558  |
| C | 4.36286327 | 4.09775367  | 5.39090289  |
| C | 4.77626802 | 1.67800613  | 5.69462740  |
| C | 3.59278236 | 4.11945777  | 6.51412696  |
| C | 4.98970192 | 2.87522378  | 4.93853334  |
| C | 5.36070984 | 0.46737210  | 5.26706134  |
| H | 3.11549756 | 5.03689723  | 6.85440518  |
| H | 4.51664080 | 5.00299994  | 4.80330728  |
| C | 6.14087485 | 0.42288898  | 4.09246401  |
| C | 6.72700512 | -0.80997531 | 3.61568134  |
| C | 6.36139349 | 1.62134093  | 3.33923756  |
| H | 7.32168694 | 2.45589579  | 1.56366204  |
| C | 5.79417893 | 2.83266406  | 3.78205816  |
| C | 7.47507633 | -0.84197006 | 2.47822437  |
| H | 6.54820486 | -1.71666184 | 4.19459400  |
| H | 7.91267591 | -1.76880591 | 2.11321553  |
| C | 7.69834986 | 0.36050121  | 1.72487436  |
| H | 8.29573393 | 0.29719203  | 0.81688901  |
| C | 7.16590600 | 1.54343879  | 2.13949447  |
| H | 0.02607907 | 7.98077134  | 0.06171117  |
| C | 1.00157759 | 7.50159218  | 0.00567781  |
| H | 1.03478113 | 7.36096338  | -2.12714088 |
| C | 1.55552414 | 7.15881264  | -1.19023536 |

|   |            |             |             |
|---|------------|-------------|-------------|
| C | 2.92213381 | 6.63153869  | 1.21172049  |
| C | 2.84736360 | 6.51282147  | -1.25979582 |
| C | 1.69780022 | 7.22746868  | 1.23209106  |
| C | 3.54708330 | 6.25363596  | -0.03682333 |
| C | 3.42332001 | 6.13187318  | -2.48997787 |
| H | 1.21858270 | 7.50309610  | 2.17025142  |
| H | 3.45079696 | 6.40963980  | 2.13913786  |
| C | 4.67695436 | 5.48410556  | -2.52475202 |
| C | 5.27724642 | 5.05190306  | -3.76694433 |
| C | 5.38221349 | 5.23614839  | -1.30364424 |
| H | 7.19010422 | 4.37456412  | -0.43357704 |
| C | 4.81420024 | 5.64128687  | -0.07947163 |
| C | 6.48648845 | 4.42526401  | -3.78623072 |
| H | 4.72896894 | 5.24016421  | -4.69072196 |
| H | 6.93863839 | 4.09488357  | -4.71892499 |
| C | 7.19355959 | 4.17844018  | -2.56067124 |
| H | 8.15441995 | 3.66932954  | -2.61281976 |
| C | 6.66375161 | 4.56877195  | -1.36812570 |
| C | 6.06001805 | 4.08955677  | 3.03411973  |
| C | 6.50880364 | 6.41708918  | 1.58810903  |
| N | 5.34799297 | 4.29695308  | 1.88204302  |
| C | 7.00694692 | 5.00362685  | 3.51317463  |
| C | 7.22011635 | 6.17977060  | 2.76861377  |
| C | 5.57961327 | 5.43900643  | 1.17972993  |
| H | 2.60888903 | -6.89412856 | 2.02657561  |
| C | 2.57682734 | -6.22807591 | 2.88748715  |
| H | 0.54881772 | -6.66397386 | 3.39170840  |
| C | 1.45008923 | -6.10309154 | 3.64204310  |
| C | 3.75296352 | -4.61315178 | 4.26462416  |
| C | 1.40436244 | -5.20433177 | 4.77478950  |
| C | 3.75513177 | -5.47119533 | 3.20738442  |
| C | 2.57604887 | -4.44052643 | 5.08718230  |
| C | 0.25216005 | -5.06259805 | 5.57270766  |
| H | 4.63650146 | -5.59858438 | 2.58206731  |

|   |             |             |             |
|---|-------------|-------------|-------------|
| H | 4.64034360  | -4.03076290 | 4.51520308  |
| C | 0.22065151  | -4.14406250 | 6.64225453  |
| C | -0.96629993 | -3.94063152 | 7.44352498  |
| C | 1.39016001  | -3.37800138 | 6.94982668  |
| H | 2.23398960  | -1.86953565 | 8.27822441  |
| C | 2.55788772  | -3.54303621 | 6.17501086  |
| C | -0.97638230 | -3.04909957 | 8.47336545  |
| H | -1.86054424 | -4.51215147 | 7.19412930  |
| H | -1.87039821 | -2.88959608 | 9.07371931  |
| C | 0.19971070  | -2.28746719 | 8.78809304  |
| H | 0.15396163  | -1.58447956 | 9.61694606  |
| C | 1.33571312  | -2.44585979 | 8.05344722  |
| C | -3.24638823 | 2.04055796  | -6.87830933 |
| C | -5.29166025 | 0.31604370  | -7.61685286 |
| C | -3.81164721 | 2.18025715  | -8.15182100 |
| N | -3.65634078 | 1.08606328  | -5.98572267 |
| C | -4.66130347 | 0.24695014  | -6.35776037 |
| C | -4.84837784 | 1.29687199  | -8.50977073 |
| C | -1.23354064 | -6.98375912 | 6.17103796  |
| C | -2.83275080 | -6.34628543 | 3.99310887  |
| C | -2.37984603 | -7.73780505 | 5.90169065  |
| C | -0.94488254 | -5.90488513 | 5.30985522  |
| N | -1.72034047 | -5.58568843 | 4.23825160  |
| C | -3.20444146 | -7.42691617 | 4.80358214  |
| H | -7.56774505 | 2.29662619  | -2.94485419 |
| C | -7.24155512 | 1.26979468  | -3.10202952 |
| H | -6.04407103 | 1.70647772  | -4.81512333 |
| C | -6.40970219 | 0.94194212  | -4.12930808 |
| C | -7.31235935 | -1.03394514 | -2.34263011 |
| C | -5.96690767 | -0.42103236 | -4.32619261 |
| C | -7.70371487 | 0.26139927  | -2.18941165 |
| C | -6.42917522 | -1.42760846 | -3.41769962 |
| C | -5.10020181 | -0.78100042 | -5.37683302 |
| H | -8.36320313 | 0.56226220  | -1.37801248 |

|   |             |             |             |
|---|-------------|-------------|-------------|
| H | -7.65318913 | -1.80777410 | -1.65379077 |
| C | -4.65718657 | -2.11034961 | -5.52666644 |
| C | -3.73144373 | -2.49559774 | -6.56910276 |
| C | -5.12728859 | -3.11731396 | -4.62366907 |
| H | -5.04122167 | -5.23634604 | -4.11757659 |
| C | -6.01324894 | -2.76557169 | -3.58355319 |
| C | -3.31996059 | -3.78720023 | -6.70181713 |
| H | -3.36068204 | -1.72057802 | -7.24011247 |
| H | -2.61722585 | -4.07937973 | -7.48041017 |
| C | -3.80255849 | -4.80053720 | -5.80548496 |
| H | -3.45269406 | -5.82151442 | -5.94323948 |
| C | -4.67052893 | -4.47665114 | -4.80709063 |
| H | -5.47412305 | -2.27293292 | 4.88704630  |
| C | -5.42573170 | -2.93533361 | 4.02420475  |
| H | -3.93190899 | -4.21809191 | 4.84947249  |
| C | -4.58436019 | -4.00586622 | 4.00181854  |
| C | -6.22938848 | -3.44176735 | 1.79118683  |
| C | -4.51081085 | -4.87526221 | 2.84778435  |
| C | -6.26966887 | -2.64897399 | 2.89749320  |
| C | -5.34418549 | -4.58318516 | 1.71917030  |
| C | -3.65287218 | -5.99169502 | 2.80500413  |
| H | -6.92994200 | -1.78580769 | 2.95296733  |
| H | -6.86349935 | -3.23274699 | 0.92899638  |
| C | -3.57053840 | -6.79809638 | 1.65104312  |
| C | -2.66574526 | -7.92337254 | 1.56458466  |
| C | -4.39782532 | -6.50025198 | 0.52132638  |
| H | -4.93167229 | -7.10308927 | -1.50448315 |
| C | -5.28293888 | -5.40253839 | 0.57290242  |
| C | -2.59951301 | -8.68899994 | 0.43992447  |
| H | -2.02979671 | -8.14056069 | 2.42302849  |
| H | -1.91659448 | -9.53396662 | 0.37125552  |
| C | -3.43289484 | -8.39329236 | -0.69165313 |
| H | -3.35148463 | -9.02589815 | -1.57282020 |
| C | -4.29599352 | -7.34038892 | -0.65080906 |

|   |              |             |             |
|---|--------------|-------------|-------------|
| C | -6.48807693  | -3.80093450 | -2.64101982 |
| C | -7.38202760  | -5.72703940 | -0.80337563 |
| C | -5.71122595  | -4.13738116 | -1.52724062 |
| C | -7.72546337  | -4.46547730 | -2.82170533 |
| C | -8.18475466  | -5.42823127 | -1.91268116 |
| C | -6.13334048  | -5.09051733 | -0.59569335 |
| H | -9.13276951  | -5.92594131 | -2.06189565 |
| O | -7.70396597  | -6.63675410 | 0.16738374  |
| O | -8.40117424  | -4.07510319 | -3.94763624 |
| O | 7.11692467   | -0.36980674 | 7.20241611  |
| O | 4.38246124   | -4.33783006 | 8.07390140  |
| C | -8.96449533  | -7.34381719 | 0.06215160  |
| H | -9.80010060  | -6.64016809 | 0.10620164  |
| H | -8.93428084  | -7.97565699 | 0.96105854  |
| H | -8.98387391  | -7.95375620 | -0.84485825 |
| C | -9.68684402  | -4.68258761 | -4.22634051 |
| H | -9.57273780  | -5.75863367 | -4.38287019 |
| H | -9.96926656  | -4.17631596 | -5.15971191 |
| H | -10.39683796 | -4.45411300 | -3.42681677 |
| C | 8.12367576   | -0.72239971 | 8.18324815  |
| H | 8.82548475   | 0.11784756  | 8.08538999  |
| H | 8.60369032   | -1.66672063 | 7.91300220  |
| H | 7.68527543   | -0.75214614 | 9.18424984  |
| C | 5.28395691   | -4.86067475 | 9.08064995  |
| H | 6.26208010   | -5.07418978 | 8.64107701  |
| H | 4.77195284   | -5.78857542 | 9.37071745  |
| H | 5.35220898   | -4.17008902 | 9.92543428  |
| H | 1.43023048   | 4.65378359  | -3.51673912 |
| H | -4.74609967  | -3.63898546 | -1.37834063 |
| H | 3.27822300   | -1.22189953 | 5.03956503  |
| O | 3.99031201   | 8.29429303  | -4.09238670 |
| O | 0.57557673   | 6.89234189  | -7.30967631 |
| C | 4.38001216   | 9.45808837  | -4.86276066 |
| H | 5.17158067   | 9.88294658  | -4.23014371 |

|   |             |              |              |
|---|-------------|--------------|--------------|
| H | 3.53922137  | 10.15075689  | -4.95653775  |
| H | 4.77650975  | 9.15498369   | -5.83554572  |
| C | 0.83968052  | 7.98737028   | -8.22135473  |
| H | 0.63114267  | 8.94476813   | -7.73656159  |
| H | 0.11274942  | 7.78420220   | -9.02041550  |
| H | 1.86383181  | 7.92874003   | -8.59943664  |
| H | -3.46930128 | 2.94252729   | -8.84728246  |
| H | -6.08915651 | -0.37742064  | -7.85708250  |
| H | -4.09717332 | -8.01254441  | 4.59865962   |
| H | -0.57374604 | -7.19777332  | 7.00372116   |
| H | 7.56483018  | 4.81944692   | 4.42804367   |
| H | 6.64757429  | 7.30986396   | 0.98969079   |
| O | 8.15996562  | 7.01048389   | 3.31870855   |
| O | -2.82127617 | -8.81223410  | 6.62816222   |
| O | -5.33691761 | 1.51195296   | -9.77110000  |
| C | 8.45366513  | 8.25216872   | 2.62871555   |
| H | 9.21697844  | 8.69461319   | 3.28202810   |
| H | 7.55989862  | 8.88131343   | 2.58427260   |
| H | 8.85791713  | 8.04580404   | 1.63346163   |
| C | -2.03922575 | -9.21806532  | 7.78032391   |
| H | -1.03637025 | -9.52400121  | 7.46844462   |
| H | -2.61698407 | -10.07471893 | 8.15108354   |
| H | -2.00890850 | -8.41297643  | 8.52022791   |
| C | -6.41040097 | 0.65492622   | -10.23724594 |
| H | -6.07557861 | -0.38581493  | -10.27370884 |
| H | -6.58761734 | 1.04915211   | -11.24640664 |
| H | -7.29454222 | 0.77771815   | -9.60497840  |
| C | 2.41701857  | -0.24953628  | 2.92455252   |
| C | 2.88979621  | -1.44476163  | 2.22282348   |
| C | 1.77578258  | -2.39536649  | 2.20721868   |
| C | 0.63480288  | -1.78841103  | 2.91648151   |
| C | 1.02564425  | -0.48144652  | 3.35252176   |
| C | 2.80277867  | 0.99844401   | 2.49687522   |
| C | 3.72438551  | -1.32402889  | 1.12106449   |

|   |             |             |             |
|---|-------------|-------------|-------------|
| C | 1.55334399  | -3.17693509 | 1.09783821  |
| C | -0.70262165 | -2.07986783 | 2.54593054  |
| C | 0.09501414  | 0.58451691  | 3.43632984  |
| C | 0.17517556  | -3.40108240 | 0.62469290  |
| C | 2.43010591  | -3.05776945 | -0.06899646 |
| C | -1.66068913 | -1.09160170 | 2.88711307  |
| C | 0.19104611  | -3.40848903 | -0.80754570 |
| C | 3.48628772  | -2.15740262 | -0.06345756 |
| C | 4.13622978  | 0.00949423  | 0.66355895  |
| C | -0.94157101 | -2.91866463 | 1.35343543  |
| C | -1.59326549 | -1.12918567 | -3.14219709 |
| C | 1.57901882  | -3.18999576 | -1.25341987 |
| C | 3.74988958  | -1.33861725 | -1.25353703 |
| C | 4.15243027  | -0.00035132 | -0.80478123 |
| C | 3.68795780  | 1.13605349  | 1.33759027  |
| C | 1.82120822  | 2.09879820  | 2.46910130  |
| C | 3.22838636  | 2.31071691  | 0.59178220  |
| C | 2.07966262  | 2.89750854  | 1.30860723  |
| C | 2.94119419  | -1.47451981 | -2.37330038 |
| C | -2.92942243 | -0.96691526 | 2.14675483  |
| C | -1.26903123 | 0.21503456  | 3.32394873  |
| C | -2.28644048 | 1.17787781  | 2.86480931  |
| C | 3.71722691  | 1.11755022  | -1.50258472 |
| C | 0.50880260  | 1.92557420  | 2.97624176  |
| C | 2.85939778  | 0.96435008  | -2.67991075 |
| C | -3.32668378 | 0.44252622  | 2.14246162  |
| C | -1.90176990 | 2.42629563  | 2.43601952  |
| C | -2.53162412 | 3.02333308  | 1.25650450  |
| C | -0.47439343 | 2.79447091  | 2.43882871  |
| C | 1.82625032  | -2.42387993 | -2.36801855 |
| C | -0.21697601 | 3.59224530  | 1.27817997  |
| C | 2.48445691  | -0.28975074 | -3.10159829 |
| C | 1.87691481  | 2.06251775  | -2.68621701 |
| C | 0.70184641  | -1.82640326 | -3.11078248 |



|   |             |             |             |
|---|-------------|-------------|-------------|
| C | 3.24352167  | 2.30192633  | -0.78323207 |
| C | -2.87764196 | -0.99438507 | -2.43001024 |
| C | 1.10245894  | -0.52639790 | -3.55738257 |
| C | -1.47948576 | 3.73655866  | 0.53058587  |
| C | 1.03376474  | 3.55301850  | 0.61114141  |
| C | 1.04927249  | 3.54102227  | -0.86515315 |
| C | -3.92599485 | 0.99871262  | 1.02096003  |
| C | -1.19323199 | 0.17117254  | -3.58996603 |
| C | -0.18574005 | 3.57177402  | -1.56081354 |
| C | -3.27771129 | 0.41476008  | -2.45587192 |
| C | -1.46406078 | 3.72680756  | -0.84448598 |
| C | -3.51462373 | 2.33165481  | 0.56249213  |
| C | -3.90080739 | 0.98413067  | -1.35500645 |
| C | -3.50003468 | 2.32333573  | -0.90515319 |
| C | -4.16395644 | 0.16594030  | -0.16400129 |
| C | -3.78601429 | -1.16899646 | -0.15055109 |
| C | -3.12364556 | -1.75981773 | -1.31521745 |
| C | -2.22180968 | 1.14099103  | -3.16651596 |
| C | -2.50046765 | 3.00434874  | -1.58567365 |
| C | 2.11025266  | 2.87549038  | -1.53003495 |
| C | -0.41890348 | 2.75930279  | -2.71733089 |
| C | -1.84635752 | 2.39511042  | -2.74564753 |
| C | 0.17346520  | 0.53835996  | -3.67621441 |
| C | 0.57632636  | 1.88411041  | -3.22172110 |
| C | -3.15140657 | -1.74688390 | 1.03619652  |
| C | -2.12002313 | -2.70321435 | 0.59458001  |
| C | -0.64324929 | -2.11117465 | -2.76427320 |
| C | -2.10304807 | -2.71020049 | -0.83742061 |
| C | -0.90818532 | -2.93382048 | -1.56655939 |

## References

1. D.-S. Guo, V. D. Uzunova, X. Su, Y. Liu & W. M. Nau, *Chem. Sci.* **2011**, *2*, 1722-1734.
2. G. M. Sheldrick, *Acta. Cryst.* **2015**, *71*, 3-8.
3. O. V. Dolomanov, L. J. Bourhis, R. J. Gildea, J. A. K. Howard, & H. J. Puschmann, *Appl. Cryst.* **2009**, *42*, 339-341.
4. Gaussian 16, Revision A.03, M. J. Frisch, G. W. Trucks, H. B. Schlegel, G. E. Scuseria, M. A. Robb, J. R. Cheeseman, G. Scalmani, V. Barone, G. A. Petersson, H. Nakatsuji, X. Li, M. Caricato, A. V. Marenich, J. Bloino, B. G. Janesko, R. Gomperts, B. Mennucci, H. P. Hratchian, J. V. Ortiz, A. F. Izmaylov, J. L. Sonnenberg, D. Williams-Young, F. Ding, F. Lipparini, F. Egidi, J. Goings, B. Peng, A. Petrone, T. Henderson, D. Ranasinghe, V. G. Zakrzewski, J. Gao, N. Rega, G. Zheng, W. Liang, M. Hada, M. Ehara, K. Toyota, R. Fukuda, J. Hasegawa, M. Ishida, T. Nakajima, Y. Honda, O. Kitao, H. Nakai, T. Vreven, K. Throssell, J. A. Montgomery, Jr., J. E. Peralta, F. Ogliaro, M. J. Bearpark, J. J. Heyd, E. N. Brothers, K. N. Kudin, V. N. Staroverov, T. A. Keith, R. Kobayashi, J. Normand, K. Raghavachari, A. P. Rendell, J. C. Burant, S. S. Iyengar, J. Tomasi, M. Cossi, J. M. Millam, M. Klene, C. Adamo, R. Cammi, J. W. Ochterski, R. L. Martin, K. Morokuma, O. Farkas, J. B. Foresman, and D. J. Fox, Gaussian, 11., Wallingford CT, **2016**.
5. J.-D. Chai, M. Head-Gordon, *Phys. Chem. Chem. Phys.* **2008**, *10*, 6615–6620.
6. R. Krishnan, J. S. Binkley, R. Seeger, J. A. Pople, *J. Chem. Phys.* **1980**, *72*, 650-654.
7. Lu, T., & Chen, Q. *J. Comput. Chem.* **2022**, *43*, 539-555.
8. Lu T., & Chen F. *J. Comput. Chem.* **2012**, *33*, 580–592.
9. Zhang J., & Lu T. Efficient evaluation of electrostatic potential with computerized optimized code. *Phys. Chem. Chem. Phys.* **2021**, *23*, 20323-20328.
10. Humphrey W., Dalke A., Schulten K. *J. Mol. Graph. Model.* **1996**, *14*, 33-38.
11. Li, Z.; Kishi, N.; Yoza, K.; Akita, M.; Yoshizawa, M. *Chem. Eur. J.* **2012**, *18*, 8358-8365.
